1 **Title:**

2 Population genomics reveals complex patterns of immune gene evolution in monarch butterflies  
3 (*Danaus plexippus*)  
4

5 **Short running title:** Immune gene evolution in monarch butterflies  
6

7 Wen-Hao Tan<sup>1\*</sup>, Andrew J. Mongue<sup>2</sup>, Jacobus C. de Roode<sup>1</sup>, Nicole M. Gerardo<sup>1</sup>, James R.  
8 Walters<sup>2</sup>  
9

10 <sup>1</sup>Department of Biology, Emory University, Atlanta, Georgia, United States of America.

11 <sup>2</sup>Department of Ecology and Evolutionary Biology, University of Kansas, Lawrence, Kansas,  
12 United States of America.

13 \*Corresponding author: Wen-Hao Tan ([wen-hao.tan@emory.edu](mailto:wen-hao.tan@emory.edu))  
14

15 **ABSTRACT**

16 Immune genes presumably rapidly evolve as pathogens exert strong selection pressures on  
17 host defense, but the evolution of immune genes is also constrained by trade-offs with other  
18 biological functions and shaped by the environmental context. Thus, immune genes may exhibit  
19 complex evolutionary patterns, particularly when organisms disperse to or live in variable  
20 environments. We examined the evolutionary patterns of the full set of known canonical immune  
21 genes within and among populations of monarch butterflies (*Danaus plexippus*), and relative to a  
22 closely related species (*D. gilippus*). Monarchs represent a system with a known evolutionary

23 history, in which North American monarchs dispersed to form novel populations across the world,  
24 providing an opportunity to explore the evolution of immunity in the light of population expansion  
25 into novel environments. By analyzing a whole-genome resequencing dataset across populations,  
26 we found that immune genes as a whole do not exhibit consistent patterns of selection,  
27 differentiation, or genetic variation, but that patterns are specific to functional classes. Species  
28 comparisons between *D. plexippus* and *D. gilippus* and analyses of monarch populations both  
29 revealed consistently low levels of genetic variation in signaling genes, suggesting conservation of  
30 these genes over evolutionary time. Modulation genes showed the opposite pattern, with signatures  
31 of relaxed selection across populations. In contrast, recognition and effector genes exhibited less  
32 consistent patterns. When focusing on genes with exceptionally strong signatures of selection or  
33 differentiation, we also found population-specific patterns, consistent with the hypothesis that  
34 monarch populations do not face uniform selection pressures with respect to immune function.

35

36 **Keywords:** immunity, natural selection, Lepidoptera, *Danaus*, ecological immunology

37

## 38 **1 INTRODUCTION**

39 The cellular and humoral immune systems provide one of the primary animal defenses against  
40 pathogens. Given that pathogens exert strong selection pressure on their hosts, immunity-related  
41 genes are presumed to be under selection and rapidly evolving due to host-pathogen coevolutionary  
42 arms races (McTaggart, Obbard, Conlon, & Little, 2012; Schlenke & Begun, 2003). However, the  
43 evolution of immune genes is also constrained by trade-offs with other biological functions and  
44 shaped by environmental context (Demas & Nelson, 2012). When animals colonize novel

45 environments, they often encounter novel ecological conditions, including resources and pathogens,  
46 that could influence disease susceptibility and alter selection pressures on immune functions  
47 (Eizaguirre, Lenz, Kalbe, & Milinski, 2012). In addition to cellular and humoral immune defenses,  
48 animals may use behavioral defenses, medicinal compounds, and symbionts to protect against  
49 pathogens (Parker, Barribeau, Laughton, de Roode, & Gerardo, 2011). Utilization of alternative  
50 defenses may vary across populations due to environmental context, selection, plasticity, and  
51 genetic drift. These differences, in turn, could shape immune gene evolution across populations.  
52 Taken together, the evolutionary patterns of immune genes may be complicated, particularly when  
53 organisms disperse to novel environments.

54       The cellular and humoral immune system of insects is relatively simple compared to the  
55 vertebrate immune system, potentially facilitating study of immune gene evolution. The canonical  
56 immune system of insects mainly consists of four functional classes: recognition (e.g.,  
57 peptidoglycan recognition proteins or PGRPs), signaling (e.g., the Toll signaling pathway),  
58 modulation (e.g., CLIP serine proteases), and effector (e.g., antimicrobial peptides: AMPs)  
59 (Christophides et al., 2002). Insect immune responses usually begin with the identification of  
60 foreign molecules by pattern recognition receptors encoded by recognition genes. The recognition  
61 of foreign molecules activates downstream signaling cascades that involve proteins encoded by  
62 signaling and modulation genes. For instance, recognition of Gram-positive bacteria and fungi  
63 often triggers the activation of the Toll signaling pathway, while recognition of Gram-negative  
64 bacteria often triggers the activation of the *immune deficiency* (IMD) signaling pathway. These  
65 signaling cascades lead to production of effector proteins (e.g., AMPs, pro-phenoloxidasases that lead  
66 to melanization responses) that directly interact with pathogens (Lemaitre & Hoffmann, 2007).

67       Some studies of insect immune gene evolution have demonstrated that immune genes rapidly

68 evolve. For example, Erler et al. (2014) showed that AMPs evolve much faster than non-immune  
69 genes in multiple bumblebee species, and Viljakainen et al. (2009) demonstrated that a select subset  
70 of immune genes (14 recognition and effector genes) are rapidly evolving in both honey bees and  
71 ants. However, these studies and most others have focused on only a few genes or one part of the  
72 immune system, without consideration of the full set of canonical immune genes.

73 Consideration of the immune gene set as a whole is important, in part, because different  
74 immune components may face different selection pressures. Specifically, coevolutionary theory  
75 would predict that molecules that directly interact with rapidly evolving pathogens – such as those  
76 encoded by recognition and effector genes – may undergo faster evolution than those involved in  
77 signal transduction. Indeed, a comparative study of twelve *Drosophila* species found that  
78 recognition proteins and effectors are rapidly evolving and highly differentiated; in contrast,  
79 proteins within signaling transduction cascades are more constrained across species (Sackton et al.,  
80 2007).

81 To our knowledge, only a few studies have taken a comprehensive, population-centered  
82 approach: Early et al. (2017) and Keehnen et al. (2018) examined the evolution of the full set of  
83 canonical immune genes across populations in fruit flies (*Drosophila melanogaster*) and a butterfly  
84 (*Pieris napi*), respectively. Studies on both species demonstrated that immune gene functional  
85 classes vary in their patterns of selection and differentiation, with conservation of signaling genes,  
86 balancing selection acting on effector genes, and recognition genes showing higher levels of  
87 between-population differentiation (Chapman, Hill, & Unckless, 2018; Early et al., 2017; Keehnen  
88 et al., 2018; Unckless, Howick, & Lazzaro, 2016).

89 In this study, we examined evolution of the full set of canonical immune genes across natural  
90 populations of monarch butterflies (*Danaus plexippus*). Monarchs are widely distributed, specialist

91 herbivores that feed on toxic milkweed plants during their larval stage (Ackery & Vane-Wright,  
92 1984; Oberhauser & Solensky, 2004). Monarchs originated in North America and colonized  
93 worldwide locations in the 19<sup>th</sup> century through independent dispersal events across the Pacific  
94 Ocean, the Atlantic Ocean, and Central-South America (Fig. 1) (Ackery & Vane-Wright, 1984;  
95 Zhan et al., 2014), providing an opportunity to study immune gene evolution in the context of a  
96 known evolutionary history. Importantly, through these dispersal events, monarchs formed  
97 populations in which they relied on more toxic milkweed host plants and in which they experienced  
98 greater risk of infection by the common monarch parasite *Ophryocystis elektroscirrha* (Altizer &  
99 de Roode, 2015), likely altering selection on the monarch immune system. Here, we assessed  
100 patterns of divergence, diversity, and selection for monarch immune genes, using *D. gilippus* as an  
101 outgroup and contrasting the ancestral North American monarch population with geographically  
102 and genetically distinct derived populations.

103

## 104 **2 MATERIALS AND METHODS**

### 105 **2.1 Overview of approach**

106 Differential selection pressures owing to ecological differences could affect the type and  
107 strength of selection on immune genes. In addition to selection, other factors such as demographic  
108 history and local genomic factors also may affect their evolutionary patterns. Given that several  
109 population genetic measures of selection are sensitive to demographic effects, past demographic  
110 history and recent dispersal are important factors that could influence and/or confound observed  
111 signatures of selection (Eyre-Walker & Keightley, 2009; Vitti, Grossman, & Sabeti, 2013). In most  
112 population genomic studies of immune genes, relatively little is known about the demographic

113 history and the ecological differences of the focal populations; however, in monarch butterflies,  
114 previous population genetic and genomic studies have inferred that monarchs originated in North  
115 America and recently spread around the world via three major dispersal events (Pierce et al., 2014;  
116 Zhan et al., 2014). While these events led to formation of populations subject to different ecological  
117 conditions, the dispersal process itself may also influence patterns of population genetics. To  
118 account for this, we used a paired-control approach to determine if signatures of selection in  
119 functional classes of immune genes differ from those in the background genome. In addition, we  
120 identified individual immune genes that are genome-wide outliers for combinations of population  
121 genetic parameters, indicating they are likely experiencing different selective pressures.

122

## 123 **2.2 The population genomic dataset**

124 We obtained a whole genome Illumina sequencing dataset from Zhan et al. (2014), who  
125 sequenced monarch samples across populations worldwide. Based on previous population genetic  
126 and genomic studies (Pierce et al., 2014; Zhan et al., 2014), we assigned monarch samples into  
127 genetic populations according to their collection location. We excluded samples with average  
128 sequencing depth lower than 10X for quality control purposes. We used a total of 37 whole monarch  
129 genomes in our study, including the ancestral population (North America) and derived populations  
130 in South Florida, the Pacific, and the Atlantic (Fig. 1, supplemental information Table S1).

131 We aligned sequencing reads to the reference monarch genome (Zhan, Merlin, Boore, &  
132 Reppert, 2011) using Bowtie2 with the option “--very-sensitive-local” (Langmead & Salzberg,  
133 2012). After reference mapping, we took the alignments through the Genome Analysis Tool Kit’s  
134 best practices pipeline to remove PCR duplicates and realign around variable insertions and  
135 deletions (McKenna et al., 2010).

136

### 137 **2.3 Gene sets**

138 We obtained a full set of annotated monarch immune genes published by the *Heliconius*  
139 Genome Consortium (2012), which included a set of annotated (*Heliconius*) immune genes and  
140 their orthologs in several species, including monarchs. The monarch orthologs listed in this  
141 published dataset were based on a previous version of monarch genome annotation (OGS1.0), so  
142 we updated this full set of immune genes to the latest version of gene annotation (OGS2.0) using  
143 information provided in Monarch Base (Zhan & Reppert, 2013). This updated monarch immune  
144 gene set contains 114 genes belonging to functional classes of recognition, signaling, modulation,  
145 and effector (see supplemental information Table S2). We also obtained the latest version (OGS2.0)  
146 of all the annotated monarch genes from the published reference genome (Zhan et al., 2011; Zhan  
147 & Reppert, 2013) in order to compare evolution of immune genes to evolution of non-immune  
148 genes (as controls) in the background genome.

149 We restricted our analyses to autosomal genes to avoid the complication of unequal sampling  
150 between autosomes and the Z sex chromosome; sequenced individuals were of different sexes, so  
151 a variable number of Z chromosomes were sampled. We did not perform a separate analysis of Z-  
152 linked genes due to sample size limitations. We identified Z-linked immune genes based on  
153 chromosomal assignments obtained from Mongue et al. (2017). The majority of immune genes are  
154 on autosomes, with only 12 genes located on the Z chromosome (see supplemental information  
155 Table S2).

156

### 157 **2.4 Population genetic analyses**

158 We calculated four population genetic statistics: pairwise nucleotide diversity ( $\pi$ ),

159 Watterson's  $\theta$  (Nei, 1979; Watterson, 1975), Tajima's D (Tajima, 1989), and  $F_{ST}$  (Wright, 1921).  
160 We generated folded site frequency spectra (SFS) and calculated the four statistics using ANGSD  
161 (Korneliussen, Albrechtsen & Nielsen, 2014). We calculated  $\pi$ , Watterson's  $\theta$  and Tajima's D for  
162 each population; we calculated  $F_{ST}$  between populations by comparing each of the three derived  
163 populations (*i.e.*, Florida, Pacific, and Atlantic) to the ancestral population (North America). For  
164 all calculations, we first generated a SFS for all genes in the same functional class to use as a prior  
165 for gene-specific parameter estimates. Using this prior, we then calculated those four population  
166 genetic statistics for each gene in the functional class. We repeated the procedures for each gene  
167 with either: (1) 0-fold degenerate sites; (2) 4-fold degenerate sites; and (3) all sites within each  
168 gene. The 0-fold and 4-fold degeneracy sites for all monarch genes were obtained from Mongue et  
169 al. (2019). The genomic position of each gene was obtained from the latest version of gene  
170 annotation (OGS2) in Monarch Base (Zhan et al., 2011). We performed all calculations for all genes  
171 in the genome. We generated inputs for ANGSD and processed the data using custom R and python  
172 scripts in R version 3.4.1 (R Core Team, 2017) and python version 2.7.5.

173

## 174 **2.5 A paired control approach to compare immune genes to the genomic background**

175 Evolutionary change of a gene can be influenced by gene length and local genomic factors,  
176 such as recombination rate and selection on nearby genes (Castellano, Coronado-Zamora, Campos,  
177 Barbadilla, & Eyre-Walker, 2016; Comeron, Ratnappan, & Bailin, 2012; Wong et al., 2008).  
178 Therefore, we evaluated whether immune genes differed from broader patterns in the genome  
179 background using a paired-control approach that compares immune genes to a selected subset of  
180 control genes. This paired-control approach enables us to take these factors into consideration,



181 assessing the patterns of selection more conservatively; our approach is similar to that used by  
182 Early et al. (2017) and Chapman, Hill, & Unckless (2018).

183 Specifically, we first constructed a pool of control genes for each immune gene based on the  
184 following criteria: (1) the length of the control genes are within either 0.5-2 times, or  $\pm 1500$  bp, of  
185 the total length of the immune gene; (2) control genes are on the same scaffold (and thus  
186 chromosome) as the immune gene; (3) control genes are not known to have immune function.  
187 Given that a high proportion of scaffolds in the reference monarch genome are relatively small in  
188 size ( $N50 = 715$  kbp) (Zhan & Reppert, 2013), in some cases control gene pools were small. When  
189 a candidate gene pool was smaller than eight genes, we relaxed the location criterion and expanded  
190 the search to the whole chromosome level, while keeping the other two criteria unchanged. In all  
191 cases, we were able to gather  $> 8$  candidate genes. Four focal immune genes did not have a  
192 chromosomal assignment. For these, we searched for genes that also did not have chromosomal  
193 assignments that fit the size and gene function criteria. We excluded genes that did not have an  
194 adequate number of 0-fold or 4-fold sites for estimating population genetic statistics from the  
195 control gene pools. For a given immune functional group, we calculated the test statistic as the  
196 summation of the difference between an immune gene and the mean of its control genes. We  
197 determined significance through 10,000 permutations. For each permutation round, we randomly  
198 sampled one gene for each immune gene from a pool containing the immune gene itself and all  
199 corresponding control genes with replacement to serve as the test gene, and calculate the difference  
200 between the test gene and the mean of the remaining genes in the pool. The permuted test statistic  
201 is calculated as the summation of those differences for genes belonging to a given immune  
202 functional group. We calculated  $P$ -values as the percentage of the 10,000 permutations in which

203 the absolute value of the test statistic (observed value) is less than the absolute mean value of the  
204 permuted sets (permuted null distribution). The paired-control analyses were performed using  
205 custom R scripts in R version 3.4.1 (R Core Team, 2017).

206

## 207 **2.6 Between-species analyses**

208 In addition to between-population comparisons, we also sought to estimate longer-term  
209 evolutionary patterns by leveraging whole genome sequencing of a congener, the queen butterfly  
210 (*Danaus gilippus*) (Zhan et al., 2014). This gave us the opportunity to look at scaled rates of  
211 divergence between species (Dn/Ds). We aligned *D. gilippus* reads to the monarch reference using  
212 the stampy alignment software (Lunter & Goodson, 2011), parameterized for an increased (10%)  
213 substitution rate between reads and reference. These data were then taken through GATK's best  
214 practice pipeline for SNP calling, including quality filtering of variants (McKenna et al., 2010).  
215 Passing variants were classified as synonymous or non-synonymous by SNPeff (Cingolani et al.,  
216 2012). Finally, we calculated Dn per gene as the number of nonsynonymous substitutions per non-  
217 synonymous site (and likewise for Ds), using previous knowledge of the degeneracy of each  
218 position in a coding sequence (Mongue et al., 2019). Owing to a substantial number of genes in  
219 both the immune and control sets with undefined Dn/Ds (created by zero counts of Ds), we did not  
220 implement a paired permutation test. Rather, we used R to perform Mann-Whitney U tests to assess  
221 significance of differences in divergence rates for immune gene classes compared to the control  
222 genes with non-zero synonymous divergence.

223 The *D. gilippus* data additionally allowed us to estimate the proportion of substitutions driven  
224 by adaptation ( $\alpha$ ) for immune genes and to compare with estimates from corresponding control  
225 genes in the monarch genome. As with established methods (Mongue et al., 2019), we used the

226 queen butterfly sequences to infer a parsimonious ancestral (allele) state at polymorphic sites in  
227 the monarch genome, allowing us to generate an unfolded SFS, *i.e.* one that differentiates ancestral  
228 and derived allele frequencies. With unfolded spectra, we employed the likelihood model  
229 implemented in polyDFE (Tataru, Mollion, Glémin, & Bataillon, 2017) to estimate  $\alpha$  and the  
230 distribution of fitness effects of new non-synonymous mutations (DFEs) while accounting for  
231 demography and errors in allele frequency polarization. To assess uncertainty in these estimates,  
232 parametric bootstrapping of input SFS (as implemented in polyDFE) was used to obtain a  
233 distribution of  $\alpha$  and DFE statistics. Significant differences in  $\alpha$  were apparent based on the non-  
234 overlapping confidence intervals of immune and control sets and did not warrant further statistical  
235 testing. Differences between DFEs were not formally tested but were used as ancillary, qualitative  
236 inferences to contextualize related results. Bootstrapping, statistical analyses, and visualization  
237 were completed with custom R scripts.

238

## 239 **2.7 Outlier analyses**

240 To identify specific loci that may experience distinctive evolutionary pressures, we searched  
241 for immune genes which are outliers relative to the genome-wide distributions of population  
242 genetic parameters. We jointly considered Tajima's  $D$  and  $F_{ST}$ , reasoning that loci showing extreme  
243 values for both parameters are likely to be of particular interest. We performed the analyses across  
244 all genes in the genome at either 0-fold sites or 4-fold sites and used information at genome-wide  
245 0-fold or 4-fold sites as prior for estimating SFS in ANGSD. We converted Tajima's  $D$  and  $F_{ST}$   
246 values into percentiles in their genome-wide distribution. We defined genes that were either in the  
247  $< 2.5^{\text{th}}$  percentile or  $> 97.5^{\text{th}}$  percentile as genome outliers. To assess the outlier patterns considering  
248 both selection and population differentiation, we evaluated the relationship of Tajima's  $D$  and  $F_{ST}$

249 for each functional class. Converting the values into percentiles also enabled us to compare patterns  
250 across populations. We visualized the patterns by plotting the Tajima's  $D$  and  $F_{ST}$  genome  
251 percentiles against each other in a 2-D plot with Tajima's  $D$  on the x-axis and  $F_{ST}$  on the y-axis.  
252 Separating the plot by the genome median of the two measures, it contains four quadrants: top-  
253 right ( $x > 0.5$  &  $y > 0.5$ ), bottom-right ( $x > 0.5$  &  $y < 0.5$ ), top-left ( $x < 0.5$  and  $y > 0.5$ ), and  
254 bottom-left ( $x < 0.5$  and  $y < 0.5$ ). Outliers falling into each of the four quadrants suggest different  
255 evolutionary scenarios: "top-right" suggests balancing selection acting differently between  
256 populations, "bottom-right" suggests balancing selection acting similarly between populations,  
257 "top-left" suggests directional selection acting differently between populations, and "bottom-left"  
258 suggests directional selection acting similarly between populations. We summarized the number of  
259 outliers in each area in contingency tables and analyzed the patterns. Due to small count numbers  
260 in some cells, we used Fisher's exact tests. In addition, we examined whether immune genes are  
261 disproportionally represented in genome-wide outliers using Chi-square tests. All statistical  
262 analyses were performed in R.

263

## 264 **3 RESULTS**

### 265 **3.1 North America: the ancestral population**

#### 266 ***A. Within-species analyses: characterizing genetic diversity and signatures of selection***

267 As a group, immune genes showed slightly lower genetic diversity compared to paired-control  
268 genes, though this result was not statistically significant (Table 1 and Fig. 2). However, levels of  
269 genetic variation varied notably among the different functional classes of immune genes. At 0-fold  
270 sites, recognition and modulation genes exhibited a trend toward higher genetic variation than their

271 respective control genes, while signaling and effector genes showed a trend toward lower genetic  
272 variation than their respective control genes. Signaling genes had a significantly lower  $\pi$  and  
273 Watterson's  $\theta$  at the 0-fold sites than controls, while other functional groups did not differ  
274 significantly from their controls. At 4-fold sites, none of the functional groups differed significantly  
275 from their controls; only the signaling genes had a marginally significantly lower  $\pi$  compared to  
276 controls.

277 Immune genes as a whole did not show a distinct pattern of selection; the full set of immune  
278 genes was not significantly different from the paired-controls (Table 1 and Fig. 2). However, as  
279 with  $\pi$  and Watterson's  $\theta$ , patterns of Tajima's D varied across different functional classes of  
280 immune genes. Recognition genes showed a trend of lower Tajima's D at both 0-fold and 4-fold  
281 sites but was only significantly lower at the 0-fold sites. Signaling genes showed a significantly  
282 lower Tajima's D than controls at only the 4-fold sites. Modulation genes did not exhibit any  
283 significant differences to the controls. Effector genes showed significantly higher Tajima's D at the  
284 4-fold sites and marginally significantly higher Tajima's D at the 0-fold sites to their respective  
285 controls.

286 Taken together, the full set of immune genes did not differ from control genes in either genetic  
287 diversity or signatures of selection; however, different functional classes exhibited significant  
288 differences. Specifically, signaling genes showed lower genetic variation than control genes,  
289 consistent with broad purifying selection; associated background selection could explain the  
290 reduced 4-fold site Tajima's D. By contrast, the strongly elevated Tajima's D among effector genes  
291 seems best explained by frequent balancing selection among these loci. Analyses based on all sites  
292 within each gene showed similar qualitative results (see supplemental information Table S3 and  
293 Fig. S1).

294

295 ***B. Between-species analyses: comparing *D. plexippus* and *D. gilippus****

296 We further assessed molecular evolutionary patterns of immune genes by estimating  
297 divergence to the closely related queen butterfly. We tested for differences in rates of divergence  
298 (Dn/Ds) between immune genes and their controls selected from the rest of the genome. We found  
299 that neither effector (Fig. 3;  $W = 2866$ ,  $P = 0.764$ ) nor signaling genes (Fig. 3;  $W = 23427$ ,  $P =$   
300  $0.352$ ) showed increased divergence compared to their controls, which is consistent with balancing  
301 and purifying selection respectively decreasing the fixation rate of variants. In contrast, we found  
302 elevated divergence in both modulation (Fig. 3;  $W = 6036.5$ ,  $P = 0.009$ ) and recognition genes (Fig.  
303 3;  $W = 1156$ ,  $P = 0.018$ ) compared to their controls. Such a result is indicative of either increased  
304 directional selection or relaxed constraint allowing more non-synonymous differences to reach  
305 fixation. Taken together with within-species analyses of nucleotide diversity, these results suggest  
306 that relaxed selection is more likely for modulation genes, but the cause of increased divergence in  
307 recognition genes is less immediately apparent.

308

309 ***C. Distributions of fitness effects and estimates of adaptive evolution***

310 To further investigate patterns of selection, we used SFS to estimate the distribution of fitness  
311 effects for new non-synonymous mutations (DFEs) among the immune gene functional classes and  
312 their control sets. Though we are unable to statistically compare differences between immune gene  
313 groups and their controls, the patterns are largely consistent with the results of other tests. Signaling  
314 genes exhibited a lack of neutral and weakly selected variants, combined with an increase in  
315 strongly deleterious and (to a lesser degree) beneficial variants (Fig. 4, second row). This pattern  
316 suggests most new variation is destined to be removed by purifying selection, with occasional

317 adaptive fixations. Modulation genes did not greatly differ from their control set, though the slight  
318 increase in inferred neutral and weakly selected variants ( $-10 < s < 1$ ) is consistent with relaxed  
319 selection in this class of genes (Fig. 4, third row). Effector genes, however, showed a lack of  
320 strongly deleterious ( $s < -100$ ) and an increase in moderately deleterious ( $-100 < s < -10$ ) variants  
321 (Fig. 4, fourth row). This dearth of strongly deleterious variants suggests that alleles can reach more  
322 intermediate frequency, as expected under balancing selection.

323 Unlike the other classes of immune genes, the DFEs for recognition genes and their controls  
324 suggest an alternative explanation for the patterns observed in other population genetic statistics.  
325 Note that here, the control genes (Fig. 4, top right) exhibit a similar pattern to the one described  
326 above for the focal set of signaling genes, *i.e.* purifying selection. The recognition genes' DFEs,  
327 however, do not appear to be skewed by strong selection. In this light, other results for recognition  
328 genes may have more to do with purifying selection on controls than on selection on the recognition  
329 genes themselves.

330 Finally, we used the DFEs to estimate  $\alpha$  (the proportion of adaptive substitutions) in each  
331 immune class and its control set. We found that  $\alpha$  was significantly different between immune genes  
332 and controls in each of the four groups, as evidenced by non-overlapping confidence intervals (Fig.  
333 5). For three of the four classes, the direction of these differences is consistent with other lines of  
334 evidence for selection. Namely, we found more adaptive evolution in effector and signaling genes  
335 and less adaptation in modulation genes compared to their controls. For recognition, however,  
336 evidence for less adaptation than controls conflicts with the evidence for selection from Tajima's  
337 D. This lower  $\alpha$ , alongside the DFEs, suggest that recognition genes are under weaker selection  
338 than their paired controls.

339

### 340 **3.2 Population-level comparisons: the ancestral and three derived populations**

#### 341 ***A. Within-population analyses: characterizing genetic diversity and signatures of selection***

342 Consistently across all four populations, the full set of immune genes did not show any  
343 significant differences compared to control genes at either 0-fold or 4-fold sites (Tables 1-4 and  
344 Fig. 6). For recognition genes, there was an overall trend toward higher genetic variation than  
345 controls at the 0-fold sites across populations; however, this was not statistically significant for any  
346 population. For signaling genes, there was an overall consistent trend toward lower genetic  
347 variation than controls at both the 0-fold and 4-fold sites across populations. Notably, in all  
348 populations, both  $\pi$  and Watterson's  $\theta$  were significantly lower than controls at the 0-fold sites of  
349 signaling genes. For modulation genes there was an overall trend toward higher genetic variation  
350 than controls across populations for both the 0-fold and 4-fold sites; however, this was not  
351 statistically significant for any of the four populations. For effector genes, the pattern was more  
352 variable, and no significant differences to the controls were found in any of the populations.

353 As a group, immune genes were not under uniformly strong directional or balancing selection  
354 in any population, with one exception: in the Atlantic population, the 0-fold sites exhibited  
355 significantly lower Tajima's D compared to the control genes, suggesting that, as a group, they  
356 experience increased directional selection (Tables 1-4 and Fig. 6). When considering genes of each  
357 functional class separately, there were differences in patterns not only between functional classes  
358 but also across populations. For recognition genes, the North America population showed a  
359 significantly lower Tajima's D at the 0-fold sites than controls, but this was not found in any other  
360 population (Florida was marginally significant). For signaling genes, the Atlantic population  
361 showed a significantly lower Tajima's D than controls at the 0-fold sites (Florida was marginally  
362 significant), but not at the 4-fold sites; in North America, Tajima's D was significantly lower than



363 controls at the 4-fold sites, but not at the 0-fold sites. For modulation genes, no significant  
364 differences to the controls were found across populations. For effector genes, both the North  
365 America and Florida populations displayed significantly higher Tajima's D values compared to  
366 their controls: in North America, Tajima's D was significantly higher than controls at the 4-fold  
367 sites, while in Florida the 0-fold sites showed higher Tajima's D than controls.

368 Taken together, across all populations, immune genes as a group did not consistently exhibit  
369 significantly different levels of genetic variation and signatures of selection. Regarding genetic  
370 variation, a highly consistent pattern across populations was that the 0-fold sites of signaling genes  
371 showed significantly lower variation compared to control genes. There was also a trend for  
372 recognition and modulation genes to have greater variation than their respective controls.  
373 Regarding signatures of selection, the four populations exhibited moderately different patterns –  
374 there was no universal pattern across all populations. While effector genes displayed significantly  
375 higher Tajima's D than controls, indicating balancing selection in some populations, recognition  
376 and signaling genes showed significantly lower Tajima's D than their controls in some populations,  
377 indicating directional selection. Analyses based on all sites within each gene showed similar  
378 qualitative results (see supplemental information Tables S3-6 and Figs. S1-4).

379

### 380 ***B. Across-population analyses: population-level differentiations***

381 We analyzed population differentiation using the ancestral population (*i.e.*, North America) as  
382 the reference population (Tables 1-4 and Fig. 7). The full set of immune genes used in this study  
383 did not display any significant differentiation compared to control genes. Across each functional  
384 class, there were no universal differences. However, there was an overall non-significant trend  
385 across populations at 0-fold sites: recognition genes showed higher  $F_{ST}$  than controls while

386 effectors displayed lower  $F_{ST}$  than controls. Between the Florida and the ancestral populations,  
387 recognition genes showed significantly greater  $F_{ST}$  than controls; between the Atlantic and the  
388 ancestral populations, effector genes showed marginally significantly lower  $F_{ST}$  than controls.  
389 Analyses based on all sites within each gene showed similar qualitative results (see supplemental  
390 information Tables S3-6 and Figs. S1-4).

391

### 392 **3.3 Outlier analyses: access the patterns of outlier immune genes**

393 We visualized Tajima's  $D$  and  $F_{ST}$  results together to assess outlier patterns, considering both  
394 signatures of selection and differentiation among populations simultaneously. In Fig. 8, outliers  
395 that fall into different areas suggest different evolutionary scenarios. Different immune gene  
396 functional groups did not seem to show distinct differences in outlier patterns, but they differed  
397 greatly in the proportion of genes that were outliers, ranging from 14.3% to 31.6% at 0-fold sites  
398 and from 7.1% to 42.9% at 4-fold sites. We separated outlier genes into five categories based on  
399 their location in the 2D Tajima's  $D$ -  $F_{ST}$  plot. We first compared whether the frequencies of outliers  
400 in each category (four outlier areas plus the central non-outlier area) differed across populations  
401 within each functional class. For the four functional classes, those frequencies did not differ  
402 significantly across populations at either the 0-fold or 4-fold sites (Table 5). Next, we compared  
403 whether the frequencies of outliers in each category differed across functional classes within each  
404 population. For the four populations, those frequencies did not differ significantly across functional  
405 classes at either the 0-fold or 4-fold sites (Table 6). In addition, we tested if immune genes, as one  
406 group, were disproportionally represented in genome-wide outliers, and found that they were not  
407 (see supplemental information Tables S7). Overall, our results indicate no statistically significant  
408 differences in outlier patterns across populations or functional classes.

409 We identified individual immune genes that were genome outliers based on 0-fold sites and  
410 summarized their statistics across populations (Table 7-8). Some genes exhibited distinct patterns  
411 across populations, as indicated by being outliers at different ends of the statistics. For example,  
412 *Pellino*, which belongs to the Toll pathway, was under directional selection (low Tajima's D) in the  
413 Florida population, while under balancing selection (high Tajima's D) in the Pacific population.  
414 One CLIP serine protease was under directional selection (low Tajima's D) in the Pacific  
415 population, while under balancing selection (high Tajima's D) in the Atlantic population. In  
416 addition, some of the patterns observed for  $F_{ST}$  outliers were population-specific – only shown in  
417 one population but not the others. Two out of three *Nimrod* genes were identified as  $F_{ST}$  outliers in  
418 the Pacific population compared to the ancestral population, and all of them showed higher  
419 differentiation (high  $F_{ST}$ ). Two out of seven Scavenger receptor (SCR) genes were identified as  $F_{ST}$   
420 outliers in the Florida population, and all of them showed higher differentiation (high  $F_{ST}$ ). In  
421 contrast, some genes were identified as outliers in half of the populations in the same direction. For  
422 instance, one Toll-like receptor and *DOMELESS* were under directional selection (low Tajima's D)  
423 in both the North America and Florida populations at the 0-fold sites; one *Attacin*-like gene showed  
424 lower differentiation (low  $F_{ST}$ ) in the Florida and Atlantic populations. However, no immune genes  
425 were consistently identified as outliers across all populations based on either Tajima's D or  $F_{ST}$ .  
426 Three genes were identified as outliers based on both Tajima's D and  $F_{ST}$ : Myeloid differentiation  
427 primary response 88 (*MyD88*), Protein inhibitor of activated STAT (*PIAS*), and one *Attacin*-like  
428 gene. *PIAS* showed a general trend of lower Tajima's D and lower  $F_{ST}$ , suggesting that it might be  
429 evolutionarily constrained. *MyD88* showed a general trend of higher  $F_{ST}$  and was an outlier in the  
430 Florida population. Also, in the Atlantic population, *MyD88* was a Tajima's D outlier, indicating  
431 directional selection. The *Attacin*-like gene showed a general trend of higher Tajima's D and was

432 an outlier in the Florida population, indicating balancing selection. Also, it was an  $F_{ST}$  outlier in  
433 the Atlantic and Florida populations, indicating low differentiation. In summary, although our  
434 results did not reveal clear patterns of outliers based on functional groups or populations, individual  
435 outlier genes were identified. These results suggest that immune genes undergo individual  
436 evolutionary trajectories, and these trajectories vary across populations.

437 The analysis of outliers supports our notion that the complex evolutionary pressures have  
438 resulted in different patterns of selection on individual genes in the different populations, involving  
439 a wide variety of biological processes and targets. A few genes that showed high population  
440 differentiation ( $F_{ST}$  outliers at the upper end) are involved in cellular immune processes, such as  
441 phagocytosis. Two SCR genes showed high differentiation only in the Florida population, while  
442 two *nimrod* genes showed high differentiation only in the Pacific population. Notably, the *Nimrod*  
443 gene family is involved in recognizing foreign object for phagocytosis, which likely has direct  
444 interactions with pathogens (Estévez-Lao & Hillyer, 2014; Kurucz et al., 2007; Somogyi, Sipos,  
445 Péntzes, & Andó, 2010). Several of the outlier genes either belong to or interact with the Toll  
446 signaling pathway. For instance, two outlier genes encode Beta-1,3-glucan recognition proteins  
447 (BGRPs), both of which recognize bacterial and/or fungal signals and are known to activate the  
448 toll signaling cascade in *Drosophila* (Kim et al., 2000). One of them is involved in activation of  
449 the phenoloxidase cascade (Matskevich, Quintin, & Ferrandon, 2010), while the other one leads to  
450 signal transmission that induces the expression of AMPs such as cecropin and attacin (Kim et al.,  
451 2000). Some members of the Toll pathway, such as *spaetzle*, *Pellino*, and *MyD88*, were identified  
452 as outliers. *MyD88*, which is involved in regulating AMPs in *Drosophila* (Tauszig-Delamasure,  
453 Bilak, Capovilla, Hoffmann, & Imler, 2002). Attacins, which are AMPs against Gram-negative  
454 bacteria, are regulated mostly by the IMD pathway but also known to have some interactions with

455 the Toll pathway (Tanji, Hu, Weber, & Ip, 2007).

456

## 457 **4 DISCUSSION**

458 Our results demonstrate that immune genes, as one group, do not exhibit uniform patterns of  
459 selection, differentiation, or high genetic variation; different function classes show different  
460 patterns. Monarchs recently spread around the world via three main dispersal events (Pierce et al.,  
461 2014; Zhan et al., 2014). During these colonization processes, they have encountered different  
462 ecological conditions that are likely to drive the evolution of immune genes. Our results show that  
463 patterns of evolutionary change in immune genes of different functional groups vary to some extent  
464 across populations, suggesting that populations might not be under a uniform selection regime.  
465 This is further supported by assessing individual genes that are genome outliers, as some of them  
466 exhibit distinct differences across populations.

467

### 468 **4.1 Population genomic patterns and adaptive evolution across different functional classes**

469 A limited body of work has demonstrated that different components of the canonical insect  
470 immune system can face distinct selection pressures. Genes encoding proteins in the core signaling  
471 pathways, for example, have been shown to be more functionally constrained (Sackton et al., 2007).  
472 Similarly, low genetic variation in signaling genes is one of the most consistent patterns found in  
473 monarchs – signaling genes showed significantly lower genetic variation than control genes in all  
474 the populations studied. Most likely, this reflects the increased removal of deleterious alleles among  
475 these loci. The DFEs of signaling genes also points to this phenomenon, indicating a much larger  
476 proportion of strongly deleterious variants among new mutations relative to control genes. Broadly

477 increased purifying selection can also help to explain the greater  $\alpha$  value, which indicates a higher  
478 proportion of adaptive amino acid substitutions between species. If most new mutations are  
479 removed by purifying selection, then any divergence observed should primarily reflect adaptation,  
480 not neutral divergence (*i.e.*, drift), even though the absolute amount of divergence might be  
481 relatively low. Indeed, such increased purifying selection, if consistent over long periods of time,  
482 should reduce overall divergence between species. However, while signaling genes do have  
483 reduced average divergence relative to controls, this difference is not significant. Thus, it is possible  
484 that the strong purifying selection we observe in *D. plexippus* is a relatively recent phenomenon  
485 that manifests patterns in population diversity but not yet at the level of species divergence. Further  
486 population genetic analysis in other *Danaus* species would be required to assess whether there are  
487 long-term patterns of selection for this group of butterflies. Given the broad finding of functional  
488 constraint in other distantly related species, such variability in evolutionary pressures among  
489 signaling genes between closely related species is an intriguing possibility.

490 In striking contrast to signaling genes, modulation genes show a consistent pattern of  
491 increased diversity. While nucleotide diversity is only somewhat elevated, and not significantly so,  
492 interspecific divergence is greatly increased. One good explanation for these patterns is that  
493 modulation genes experience relaxed selection compared to controls. This idea fits well with  
494 patterns in the DFEs, which indicates notably more neutral variants and fewer strongly deleterious  
495 variants among new mutations among modulation genes. The relatively rapid divergence of  
496 modulation genes due to fixation of neutral or weakly deleterious mutations can explain the reduced  
497  $\alpha$  value. Taken together, signaling and modulation genes both exhibited consistent evolutionary  
498 patterns across populations, suggesting that the selection regime on these two functional classes

499 might not differ strongly across populations.

500        Signaling genes and modulation genes are sometimes considered as one functional class (*e.g.*,  
501 Waterhouse et al., 2007), but our results show distinct differences in genetic diversity. Signaling  
502 genes, especially those within the Toll, IMD, JAK-STAT, and JNK pathways, are well-  
503 characterized for their function. However, relatively little is known about the functional roles of  
504 modulation genes, most of which are CLIP serine proteases (Lemaitre & Hoffmann, 2007). Our  
505 results suggest that signaling and modulation genes likely have different functional roles, as they  
506 exhibit notably distinct patterns of selection.

507        In contrast, genes that encode proteins that have direct interactions with pathogens, such as  
508 recognition and effector genes, have been shown to evolve more rapidly as they are more likely  
509 targets of host-pathogen coevolutionary arms races (Sackton et al., 2007). For effector genes, recent  
510 studies have demonstrated signatures of balancing selection in some taxa, especially for AMPs  
511 (Chapman et al., 2018; Unckless et al., 2016; Unckless & Lazzaro, 2016). Similarly, in monarchs,  
512 effector genes show notable evidence of balancing selection. Specifically, Tajima's *D* is elevated,  
513 at least in some populations. However, this elevated Tajima's *D* occurs without a clear signal of  
514 broadly elevated heterozygosity, which would be expected in many scenarios involving balancing  
515 selection. This discrepancy in observed patterns might result if a few effector genes show strongly  
516 balanced patterns, contributing substantially to greater Tajima's *D* but less so to average variation  
517 across effector loci. Anticipating or interpreting the DFE under balancing selection is not  
518 straightforward (Connallon & Clark, 2015). Yet it is very clear that the DFE is qualitatively distinct  
519 between effectors and their controls, as well as the other classes of immune genes: there appear to  
520 be many fewer new mutations showing strongly deleterious effects. Subsequently, a greater  
521 proportion of these less-deleterious variants reach the intermediate frequencies associated with

522 balancing selection.

523 We observed considerable differences in patterns of selection across populations on effector  
524 genes. Specifically, signatures of balancing selection were observed in the North America and  
525 Florida populations but not in the Pacific and Atlantic populations. One possible interpretation is  
526 that this pattern reflects a shift in selective regime among populations. When monarchs dispersed  
527 to distant locations across the Pacific and Atlantic oceans, the selection regimes shifted toward  
528 either directional selection or were relaxed, leading to a loss of selective signal in these two  
529 populations. Alternatively, the selective regime may be constant, but demographic effects,  
530 including bottlenecks and other non-equilibrium effects, are masking the signal. Specifically,  
531 bottleneck effects, which the Pacific and Atlantic populations have experienced (Pierce et al., 2014;  
532 Zhan et al., 2014), can skew allele frequencies. The effect of skewed allele frequencies due to  
533 bottlenecks can obscure the signal of balancing selection. In a more extreme scenario, one of the  
534 selected variants could be entirely removed by bottlenecks so that the balanced polymorphism  
535 cannot be restored after the population recovered. Even though we tried to account for demographic  
536 effects by using a paired-control approach, there is still a possibility that we have reduced resolution  
537 in the derived populations due to demographic effects.

538 Evolutionary analyses of immune genes in other species, particularly *Drosophila*, indicate that  
539 recognition genes have the strongest evidence for adaptive evolution among immune functional  
540 groupings (McTaggart et al., 2012; Sackton et al., 2007). By comparison, there was distinctly mixed  
541 evidence for strong selection among recognition genes in monarchs. In North America (and  
542 Florida), Tajima's D was notably reduced relative to controls for both 0-fold and 4-fold sites,  
543 though without much reduction in 4-fold heterozygosity, and even a modest increase for 0-fold  
544 heterozygosity. If this pattern reflects recent selective sweeps among some recognition genes for



545 these populations, it is likely a narrow range of parameters that would produce such skewed  
546 distributions of diversity (*i.e.*, Tajima's  $D$ ) without also affecting the amount of diversity (*i.e.*  
547 heterozygosity). Nonetheless, recurring adaptation among recognition genes could also explain the  
548 significantly elevated  $D_n/D_s$  observed in divergence to *D. gilippus*. Alternatively, this could result  
549 from relaxed constraint, as we argued above for modulators. Also, like modulators, the DFE of  
550 recognition genes suggests relatively fewer strongly selected variants compared to controls, and  $\alpha$   
551 is also lower. The mixed signals for selection in recognition loci also play out among patterns of  
552 population differentiation. The 0-fold  $F_{ST}$  between North American and Florida populations is  
553 strongly elevated relative to controls; a similar but less extreme signal occurs for Pacific vs. North  
554 America. While this could be interpreted as evidence for local adaptation among these distinct  
555 populations, no such pattern was observed among linked 4-fold sites, which might be expected to  
556 show the same pattern due to background selection. These contrasting patterns among the different  
557 analytical components employed here are not easily synthesized into a single coherent biological  
558 interpretation for recognition loci; a more detailed, gene-by-gene analysis may be required to  
559 resolve many of these discrepancies.

560 We also observed differences in patterns of selection across populations on recognition genes.  
561 Specifically, significant signatures of directional selection were observed in the North America  
562 population, but they were only marginally significant in the Florida population, and not significant  
563 in the Pacific and Atlantic populations. Intriguingly, this pattern across populations is similar to  
564 what was observed for the balancing selection on effector genes. One possible interpretation is that  
565 this pattern reflects a shift in selective regime among populations. That is, the differences reflect  
566 local adaption to pathogens. Alternatively, the selective regime may be constant, but demographic

567 effects are masking the signal. Bottleneck effects can exert similar effects as selective sweeps,  
568 removing rare alleles, but acting across the entire genome instead. The removal of rare alleles can  
569 result in a disproportional loss of genetic variation on loci with high- and intermediate-level  
570 polymorphisms compared to loci under directional selection, which already have lower  
571 polymorphism. That is, bottlenecks can result in a disproportional loss of genome-wide genetic  
572 variation compared to loci under directional selection. Similar to directional selection, selection  
573 sweeps can result in a low Tajima's D value by removing rare alleles (Nielsen & Slatkin, 2013).  
574 Therefore, although we tried to account for demographic effects in our analyses, there is still a  
575 possibility that we have a reduced resolution in the derived populations.

576 Overall, our results and those of previous studies on *Drosophila melanogaster* and *Pieris napi*  
577 (Early et al., 2017; Keehnen et al., 2018) highlight that it may be common for different components  
578 of the insect canonical immune system to have different evolutionary trajectories. A common trend  
579 among the three taxa is that genes within signaling pathways show lower levels of genetic variation,  
580 genes involved in recognition show higher levels of population differentiation in some scenarios  
581 (Early et al., 2017; Keehnen et al., 2018), and that genes encoding effector molecules (especially  
582 AMPs) show signatures of balancing selection (Chapman et al., 2018; Keehnen et al., 2018;  
583 Unckless et al., 2016). The emergence of these common patterns across insect species that differ  
584 considerably in life histories and taxonomy suggests that there may be some general evolutionary  
585 patterns among insect immune genes.

586

## 587 **4.2 Ecological differences among populations and their potential consequences for immune** 588 **gene evolution**

589 Ecological factors that vary across populations affect the strength and type of selection and

590 can therefore lead to local adaptation (Eizaguirre et al., 2012). When monarchs dispersed around  
591 the world, they experienced novel ecological conditions, likely resulting in differential selection  
592 across populations. First, different populations face different pathogen pressures. In monarchs, the  
593 most common and best-understood parasite is the virulent specialist protozoan parasite  
594 *Ophryocystis elektroscirrha*, which occurs at low prevalence in the ancestral North American  
595 population but at much greater prevalence in tropical and sub-tropical locations that monarchs  
596 colonized during their worldwide dispersal (Altizer & de Roode, 2015), resulting in greater  
597 parasitism risk and possibly stronger selection of monarch immunity. Second, although North  
598 American monarchs migrate thousands of kilometers to overwinter in Central Mexico, the derived  
599 populations that established during world-wide dispersal have become non-migratory (Zhan et al.,  
600 2014). This loss of migration is likely partly responsible for the increased parasite prevalence in  
601 derived populations. In North America, the strenuous annual migration weeds out heavily infected  
602 monarchs, thus reducing parasite prevalence. In non-migratory populations, this seasonal break on  
603 parasite transmission has been eliminated, leading to greater transmission and prevalence (Altizer  
604 & de Roode, 2015; Altizer, Hobson, Davis, De Roode, & Wassenaar, 2015; Bartel, Oberhauser, de  
605 Roode, & Altizer, 2011). Although this greater prevalence may select for greater immunity, it is  
606 also possible that the lack of a migratory phase, and the accompanying lack of a generation that  
607 needs to survive for long periods of time as it flies thousands of kilometers, results in less  
608 investment in immunity. Third, while the majority of North American monarchs utilize *Asclepias*  
609 *syrriaca* (common milkweed) as their larval host plant, monarchs in newly colonized populations  
610 rely on other species, including *A. curassavica*, *A. fruticosa*, and *A. physocarpa*. Notably, these  
611 species have greater concentrations of cardenolides (secondary toxic compounds), which have been  
612 shown to reduce *O. elektroscirrha* infection, growth and virulence (Gowler, Leon, Hunter, & de

613 Roode, 2015; Sternberg et al., 2012; Tao, Hoang, Hunter, & de Roode, 2016). The use of such  
614 medicinal compounds could in theory relax selection on immune genes, especially when immune  
615 responses are costly (de Roode, Lefèvre, & Hunter, 2013; Evans et al., 2006; Gerardo et al., 2010;  
616 Parker et al., 2011). Finally, while we know most about parasitism by *O. elektroscirra*, monarchs  
617 are undoubtedly challenged by a suite of pathogens that vary in presence and prevalence across  
618 populations. These differences in disease pressure undoubtedly shape the evolution of monarch  
619 immune defenses.

620       The different ecological conditions experienced by monarchs as they dispersed around the  
621 world do not act in isolation, resulting in a complex mosaic of factors that simultaneously select  
622 for greater or lesser investment in immunity. Furthermore, the evolutionary patterns of immune  
623 gene evolution also may be influenced by demographic history and stochastic processes. In our  
624 analyses, immune genes as a group did not display consistent patterns across populations. For  
625 instance, directional selection on recognition genes, which indicates an excess of rare alleles, was  
626 only seen in the North America population (Florida was marginally significant). Furthermore,  
627 different immune genes were outliers in different populations. This difference among populations  
628 could in part be driven by genetic drift rather than differential selection; however, few immune  
629 genes were identified as outliers in multiple populations with strikingly different patterns. For  
630 example, *Pellino*, which belongs to the Toll pathway, showed an excess of rare alleles in the Florida  
631 population (directional selection) but showed maintenance of multiple alleles at moderate  
632 frequency (balancing selection) in the Pacific population, indicating that the selection forces  
633 between these two populations are very different.

634

## 635 **5 CONCLUSIONS**

636 In summary, our results demonstrate that immune genes as a whole are not under uniform  
637 patterns of selection or differentiation compare to the genome background. Different components  
638 of the immune system exhibit different evolutionary patterns. Signaling genes exhibit consistently  
639 low levels of genetic variation across populations and between the two *Danaus* species, indicating  
640 they are likely very constrained, while modulation genes exhibit the opposite pattern - signatures  
641 of relaxed selection. In contrast, effector and recognition genes exhibit less consistent patterns  
642 across populations. In some populations, effector genes exhibit signatures of balancing selection,  
643 while recognition genes exhibit directional selection and population differentiation. We find some  
644 clear differences among populations for individual genes that are genomic outliers, suggesting that  
645 immune genes undergo individual evolutionary trajectories. To a lesser extent, we also find some  
646 population-specific differences when considering each functional class separately. These results  
647 support the hypothesis that monarch populations do not face uniform selection pressures on  
648 immune genes.

649 The identification of immune genes that are under differential selection in monarch  
650 populations opens the way for further functional and ecological characterization. In particular,  
651 population-specific patterns indicate a possibility of local adaptation, and functional  
652 characterization is needed to understand the phenotypic effects of different alleles of immune genes,  
653 especially as they relate to important ecological factors, such as the prevalence of *O. elektroscirra*  
654 and the use of medicinal milkweeds. Such functional characterization is also needed because  
655 several insect immune genes, especially signaling genes, have pleiotropic functions in  
656 immunological and non-immunological processes (Lemaitre & Hoffmann, 2007). Therefore,

657 evolutionary patterns on those genes may not be solely driven by selection pressures on immunity.

658

## 659 **ACKNOWLEDGMENTS**

660 We thank William J. Palmer for providing immune gene annotation resources for *Danaus*  
661 *plexippus*. We thank Robert L. Unckless, Joanna Chapman, Erika Diaz-Almeyda, Amanda A.  
662 Peirce, Yaw Kumi-Ansu, Venkat Talla, and the KU EEB-genetics group for helpful discussion on  
663 this research, and Robert A. Pettit III and Yu-Hui Lin for helpful guidance and discussion on  
664 bioinformatics computing. Analyses were performed on resources provided by the University of  
665 Kansas Information and Telecommunication Technology Center. This work was supported by  
666 National Science Foundation (NSF) grant IOS-1557724 to JCdR and NMG, and NSF grant DEB-  
667 1457758 to JRW.

## 668 REFERENCES

- 669 Ackery, P. R., & Vane-Wright, R. I. (1984). *Milkweed butterflies: their cladistics and biology*.  
670 Ithaca, NY: Cornell University Press.
- 671 Altizer, S., & de Roode, J. C. (2015). Monarchs and their debilitating parasites: immunity,  
672 migration, and medicinal plant use. In *Monarchs in a Changing World*.
- 673 Altizer, S., Hobson, K. A., Davis, A. K., De Roode, J. C., & Wassenaar, L. I. (2015). Do healthy  
674 monarchs migrate farther? Tracking natal origins of parasitized vs. Uninfected monarch  
675 butterflies overwintering in Mexico. *PLoS ONE*, *10*(11), e0141371.  
676 doi:10.1371/journal.pone.0141371
- 677 Bartel, R. A., Oberhauser, K. S., de Roode, J. C., & Altizer, S. (2011). Monarch butterfly  
678 migration and parasite transmission in eastern North America. *Ecology*, *92*(2), 342–351.  
679 doi:10.1890/10-0489.1
- 680 Castellano, D., Coronado-Zamora, M., Campos, J. L., Barbadilla, A., & Eyre-Walker, A. (2016).  
681 Adaptive evolution is substantially impeded by hill-Robertson interference in *Drosophila*.  
682 *Molecular Biology and Evolution*, *33*(2), 442–455. doi:10.1093/molbev/msv236
- 683 Chapman, J. R., Hill, T., & Unckless, R. L. (2018). Balancing selection drives maintenance of  
684 genetic variation in *Drosophila* antimicrobial peptides. *bioRxiv*, 298893.  
685 doi:10.1101/298893
- 686 Christophides, G. K., Zdobnov, E., Barillas-Mury, C., Birney, E., Blandin, S., Blass, C., ...  
687 Kafatos, F. C. (2002). Immunity-related genes and gene families in *Anopheles gambiae*.  
688 *Science*, *298*(5591), 159–165. doi:10.1126/science.1077136
- 689 Cingolani, P., Platts, A., Wang, L. L., Coon, M., Nguyen, T., Wang, L., ... Ruden, D. M. (2012).  
690 A program for annotating and predicting the effects of single nucleotide polymorphisms,  
691 SnpEff. *Fly*, *6*(2), 80–92. doi:10.4161/fly.19695
- 692 Comeron, J. M., Ratnappan, R., & Bailin, S. (2012). The many landscapes of recombination in  
693 *Drosophila melanogaster*. *PLoS Genetics*, *8*(10), e1002905.  
694 doi:10.1371/journal.pgen.1002905
- 695 Connallon, T., & Clark, A. G. (2015). The distribution of fitness effects in an uncertain world.  
696 *Evolution*, *69*(6), 1610–1618. doi:10.1111/evo.12673
- 697 Dasmahapatra, K. K., Walters, J. R., Briscoe, A. D., Davey, J. W., Whibley, A., Nadeau, N. J., ...  
698 Jiggins, C. D. (2012). Butterfly genome reveals promiscuous exchange of mimicry  
699 adaptations among species. *Nature*, *487*(7405), 94–98. doi:10.1038/nature11041
- 700 de Roode, J. C., Lefèvre, T., & Hunter, M. D. (2013). Self-medication in animals. *Science*,  
701 *340*(6129), 150–151. doi:10.1126/science.1235824

- 702 Demas, G. E., & Nelson, R. J. (2012). *Ecoimmunology*. New York: Oxford University Press.
- 703 Early, A. M., Arguello, J. R., Cardoso-Moreira, M., Gottipati, S., Grenier, J. K., & Clark, A. G.  
704 (2017). Survey of global genetic diversity within the *Drosophila* immune system. *Genetics*,  
705 205(1), 353–366. doi:10.1534/genetics.116.195016
- 706 Early, A. M., & Clark, A. G. (2017). Genomic signatures of local adaptation in the *Drosophila*  
707 immune response. *Fly*, 11(4), 277–283. doi:10.1080/19336934.2017.1337612
- 708 Eizaguirre, C., Lenz, T. L., Kalbe, M., & Milinski, M. (2012). Divergent selection on locally  
709 adapted major histocompatibility complex immune genes experimentally proven in the field.  
710 *Ecology Letters*, 15(7), 723–731. doi:10.1111/j.1461-0248.2012.01791.x
- 711 Erler, S., Lhomme, P., Rasmont, P., & Lattorff, H. M. G. (2014). Rapid evolution of  
712 antimicrobial peptide genes in an insect host-social parasite system. *Infection, Genetics and*  
713 *Evolution*, 23, 129–137. doi:10.1016/j.meegid.2014.02.002
- 714 Estévez-Lao, T. Y., & Hillyer, J. F. (2014). Involvement of the *Anopheles gambiae* Nimrod gene  
715 family in mosquito immune responses. *Insect Biochemistry and Molecular Biology*, 44(1),  
716 12–22. doi:10.1016/j.ibmb.2013.10.008
- 717 Evans, J. D., Aronstein, K., Chen, Y. P., Hetru, C., Imler, J. L., Jiang, H., ... Hultmark, D.  
718 (2006). Immune pathways and defence mechanisms in honey bees *Apis mellifera*. *Insect*  
719 *Molecular Biology*, 15(5), 645–656.
- 720 Eyre-Walker, A., & Keightley, P. D. (2009). Estimating the rate of adaptive molecular evolution  
721 in the presence of slightly deleterious mutations and population size change. *Molecular*  
722 *Biology and Evolution*, 26(9), 2097–2108. doi:10.1093/molbev/msp119
- 723 Gerardo, N. M., Altincicek, B., Anselme, C., Atamian, H., Barribeau, S. M., de Vos, M., ...  
724 Vilcinskis, A. (2010). Immunity and other defenses in pea aphids, *Acyrtosiphon pisum*.  
725 *Genome Biology*, 11(2), R21. doi:10.1186/gb-2010-11-2-r21
- 726 Gowler, C. D., Leon, K. E., Hunter, M. D., & de Roode, J. C. (2015). Secondary defense  
727 chemicals in milkweed reduce parasite infection in monarch butterflies, *Danaus plexippus*.  
728 *Journal of Chemical Ecology*, 41(6), 520–523. doi:10.1007/s10886-015-0586-6
- 729 Keehnen, N. L. P., Hill, J., Nylin, S., & Wheat, C. W. (2018). Microevolutionary selection  
730 dynamics acting on immune genes of the green-veined white butterfly, *Pieris napi*.  
731 *Molecular Ecology*, 27(13), 2807–2822. doi:10.1111/mec.14722
- 732 Kim, Y. S., Ryu, J. H., Han, S. J., Choi, K. H., Nam, K. B., Jang, I. H., ... Lee, W. J. (2000).  
733 Gram-negative bacteria-binding protein, a pattern recognition receptor for  
734 lipopolysaccharide and  $\beta$ -1,3-glucan that mediates the signaling for the induction of innate  
735 immune genes in *Drosophila melanogaster* cells. *Journal of Biological Chemistry*, 275(42),



- 736 32721–32727. doi:10.1074/jbc.M003934200
- 737 Korneliussen, T. S., & Nielsen, R. (2014). ANGSD: Analysis of next generation sequencing data.
- 738 *BMC Bioinformatics*, 15(1), 356. doi:doi:10.1186/s12859-014-0356-4
- 739 Kurucz, É., Márkus, R., Zsámboki, J., Folkl-Medzihradzsky, K., Darula, Z., Vilmos, P., ... Andó,
- 740 I. (2007). Nimrod, a putative phagocytosis receptor with EGF repeats in *Drosophila*
- 741 plasmatocytes. *Current Biology*, 17(7), 649–654. doi:10.1016/j.cub.2007.02.041
- 742 Langmead, B., & Salzberg, S. L. (2012). Fast gapped-read alignment with Bowtie 2. *Nature*
- 743 *Methods*, 9(4), 357–9. doi:10.1038/nmeth.1923
- 744 Lemaitre, B., & Hoffmann, J. A. (2007). The host defense of *Drosophila melanogaster*. *Annual*
- 745 *Review of Immunology*, 25(1), 697–743. doi:10.1146/annurev.immunol.25.022106.141615
- 746 Lunter, G., & Goodson, M. (2011). Stampy: a statistical algorithm for sensitive and fast mapping
- 747 of Illumina sequence reads. *Genome Research*, 21(3), 936–939. doi:10.1101/gr.111120.110
- 748 [doi]
- 749 Matskevich, A. A., Quintin, J., & Ferrandon, D. (2010). The *Drosophila* PRR GGBP3 assembles
- 750 effector complexes involved in antifungal defenses independently of its Toll-pathway
- 751 activation function. *European Journal of Immunology*, 40(5), 1244–1254.
- 752 doi:10.1002/eji.200940164
- 753 McKenna, A., Hanna, M., Banks, E., Sivachenko, Andrey Cibulskis, K., Kernytzky, A.,
- 754 Garimella, K., ... DePristo, M. A. (2010). The Genome Analysis Toolkit: a MapReduce
- 755 framework for analyzing next-generation DNA sequencing data. *Genome Research*, 20,
- 756 1297–1303. doi:doi:10.1101/gr.107524.110
- 757 McTaggart, S. J., Obbard, D. J., Conlon, C., & Little, T. J. (2012). Immune genes undergo more
- 758 adaptive evolution than non-immune system genes in *Daphnia pulex*. *BMC Evolutionary*
- 759 *Biology*, 12(1), 63. doi:10.1186/1471-2148-12-63
- 760 Mongue, A. J., Hansen, M. E., Gu, L., Sorenson, C. E., & Walters, J. R. (2019). Non-fertilizing
- 761 sperm in Lepidoptera show little evidence for recurrent positive selection. *Molecular*
- 762 *Ecology*, *In press*. doi:10.1111/mec.15096
- 763 Mongue, A. J., Nguyen, P., Volenikova, A., & Walters, J. R. (2017). Neo-sex chromosomes in
- 764 the monarch butterfly, *Danaus plexippus*. *G3: Genes, Genomes, Genetics*, 7(October),
- 765 g3.300187.2017. doi:10.1534/g3.117.300187
- 766 Nei, M. (1979). Mathematical model for studying genetic variation in terms of restriction
- 767 endonucleases. *Proceedings of the National Academy of Sciences*, 76(10), 5269–5273.
- 768 doi:10.1073/pnas.76.10.5269
- 769 Nielsen, R., & Slatkin, M. (2013). *An introduction to population genetics: theory and*

- 770 *applications*. Massachusetts: Sinauer Associates, Inc.
- 771 Oberhauser, K. S., & Solensky, M. J. (2004). *The monarch butterfly: biology and conservation*.  
772 Ithaca, NY: Cornell University Press.
- 773 Parker, B. J., Barribeau, S. M., Laughton, A. M., de Roode, J. C., & Gerardo, N. M. (2011). Non-  
774 immunological defense in an evolutionary framework. *Trends in Ecology and Evolution*,  
775 26(5), 242–248. doi:10.1016/j.tree.2011.02.005
- 776 Pierce, A. A., Zalucki, M. P., Bangura, M., Udawatta, M., Kronforst, M. R., Altizer, S., ... de  
777 Roode, J. C. (2014). Serial founder effects and genetic differentiation during worldwide  
778 range expansion of monarch butterflies. *Proceedings of the Royal Society B: Biological*  
779 *Sciences*, 281(1797), 20142230. doi:10.1098/rspb.2014.2230
- 780 R Core Team. (2017). R: A language and environment for statistical computing. R Foundation  
781 for Statistical Computing. Vienna, Austria. Retrieved from <https://www.r-project.org/>
- 782 Sackton, T. B., Lazzaro, B. P., Schlenke, T. A., Evans, J. D., Hultmark, D., & Clark, A. G.  
783 (2007). Dynamic evolution of the innate immune system in *Drosophila*. *Nature Genetics*,  
784 39(12), 1461–1468. doi:10.1038/ng.2007.60
- 785 Schlenke, T. A., & Begun, D. J. (2003). Natural selection drives *Drosophila* immune system  
786 evolution. *Genetics*, 164(4), 1471–1480.
- 787 Somogyi, K., Sipos, B., Péntzes, Z., & Andó, I. (2010). A conserved gene cluster as a putative  
788 functional unit in insect innate immunity. *FEBS Letters*, 584(21), 4375–4378.  
789 doi:10.1016/j.febslet.2010.10.014
- 790 Sternberg, E. D., Lefèvre, T., Li, J., Lopez, C., Castillejo, F. De, Li, H., ... Roode, J. C. De.  
791 (2012). Food plant-derived disease tolerance and resistance in a natural butterfly-plant-  
792 parasite interactions. *Evolution*, 66(11), 3367–3377. doi:10.5061/dryad.82j66
- 793 Tajima, F. (1989). Statistical method for testing the neutral mutation hypothesis by DNA  
794 polymorphism. *Genetics*, 123, 585–595.
- 795 Tanji, T., Hu, X., Weber, A. N. R., & Ip, Y. T. (2007). Toll and IMD pathways synergistically  
796 activate an innate immune response in *Drosophila melanogaster*. *Molecular and Cellular*  
797 *Biology*, 27(12), 4578–4588. doi:10.1128/MCB.01814-06
- 798 Tao, L., Hoang, K. M., Hunter, M. D., & de Roode, J. C. (2016). Fitness costs of animal  
799 medication: antiparasitic plant chemicals reduce fitness of monarch butterfly hosts. *The*  
800 *Journal of Animal Ecology*, 85(5), 1246–1254. doi:10.1111/1365-2656.12558
- 801 Tataru, P., Mollion, M., Glémin, S., & Bataillon, T. (2017). Inference of distribution of fitness  
802 effects and proportion of adaptive substitutions from polymorphism data. *Genetics*, 107(3),  
803 1103–1119. doi:<https://doi.org/10.1534/genetics.117.300323>

- 804 Tauszig-Delamasure, S., Bilak, H., Capovilla, M., Hoffmann, J. A., & Imler, J. L. (2002).  
805 *Drosophila* MyD88 is required for the response to fungal and Gram-positive bacterial  
806 infections. *Nature Immunology*, *3*(1), 91–97. doi:10.1038/ni747
- 807 Unckless, R. L., Howick, V. M., & Lazzaro, B. P. (2016). Convergent balancing selection on an  
808 antimicrobial peptide in *Drosophila*. *Current Biology*, *26*(2), 257–262.  
809 doi:10.1016/j.cub.2015.11.063
- 810 Unckless, R. L., & Lazzaro, B. P. (2016). The potential for adaptive maintenance of diversity in  
811 insect antimicrobial peptides. *Philosophical Transactions of the Royal Society B: Biological*  
812 *Sciences*, *371*(1695), 20150291. doi:10.1098/rstb.2015.0291
- 813 Viljakainen, L., Evans, J. D., Hasselmann, M., Rueppell, O., Tingek, S., & Pamilo, P. (2009).  
814 Rapid evolution of immune proteins in social insects. *Molecular Biology and Evolution*,  
815 *26*(8), 1791–1801. doi:10.1093/molbev/msp086
- 816 Vitti, J. J., Grossman, S. R., & Sabeti, P. C. (2013). Detecting natural selection in genomic data.  
817 *Annu. Rev. Genet.*, *47*, 97–120. doi:10.1146/annurev-genet-111212-133526
- 818 Waterhouse, R. M., Kriventseva, E. V., Meister, S., Xi, Z., Alvarez, K. S., Bartholomay, L. C., ...  
819 Christophides, G. K. (2007). Evolutionary dynamics of immune-related genes and pathways  
820 in disease-vector mosquitoes. *Science*, *316*(5832), 1738–1743. doi:10.1126/science.1139862
- 821 Watterson, G. A. (1975). On the number of segregating sites in genetical models without  
822 recombination. *Theoretical Population Biology*, *7*(2), 256–276. doi:10.1016/0040-  
823 5809(75)90020-9
- 824 Wong, A., Singh, N. D., Sackton, T. B., Zhang, Y., Oliver, B., Greenberg, A. J., ... Sturgill, D.  
825 (2008). Evolution of protein-coding genes in *Drosophila*. *Trends in Genetics*, *24*(3), 114–  
826 123. doi:10.1016/j.tig.2007.12.001
- 827 Wright, S. (1921). Systems of mating IV. The effects of selection. *Genetics*, *6*(2), 162–166.
- 828 Zhan, S., Merlin, C., Boore, J. L., & Reppert, S. M. (2011). The monarch butterfly genome yields  
829 insights into long-distance migration. *Cell*, *147*(5), 1171–1185.  
830 doi:10.1016/j.cell.2011.09.052
- 831 Zhan, S., & Reppert, S. M. (2013). MonarchBase: The monarch butterfly genome database.  
832 *Nucleic Acids Research*, *41*(D1), 758–763. doi:10.1093/nar/gks1057
- 833 Zhan, S., Zhang, W., Nütepöld, K., Hsu, J., Haeger, J. F., Zalucki, M. P., ... Kronforst, M. R.  
834 (2014). The genetics of monarch butterfly migration and warning colouration. *Nature*,  
835 *514*(7522), 317–21. doi:10.1038/nature13812
- 836

## 837 **DATA ACCESSIBILITY**

838 All sequence data were previously publicly available (Zhan et al., 2014). Custom analysis  
839 scripts can be found in the following GitHub repository:

840 [https://github.com/WaltersLab/Monarch\\_immune\\_evolution](https://github.com/WaltersLab/Monarch_immune_evolution)

841

## 842 **AUTHOR CONTRIBUTIONS**

843 WHT, JCdR, and NMG conceived and designed the study, with JRW providing additional  
844 input. WHT performed the population genetic analyses and outlier analyses, and AJM performed  
845 the between-species analyses. JCdR, NMG and JRW supervised the bioinformatic and population  
846 genetic analyses. WHT wrote the initial draft of the manuscript and all authors have edited the  
847 manuscript.

848 **TABLES AND FIGURES**

849 **Table 1.** Population genetic statistics of immune genes in the North American population using the  
 850 paired-control approach. The upper half shows results based on the 0-fold sites and the lower half  
 851 shows results based on the 4-fold sites. The  $F_{ST}$  section is non-applicable because the North  
 852 American population was the reference population used for population comparisons. “All immune”  
 853 indicates the full immune gene set. In each statistic, the first row shows the test statistic of the  
 854 immune gene group. The second row shows the proportion of 10,000 permutations in which the  
 855 difference between the means of the immune gene group and the control set was positive.  
 856 Percentages < 2.5% and > 97.5 % are labeled in bold. The third row shows the  $P$ -value.  $P$ -values  
 857 < 0.05 are labeled in bold. Asterisks indicate: \* < 0.05, \*\* < 0.01, \*\*\* < 0.001.

|                                       | All Immune | Recognition   | Signaling     | Modulation | Effector      |
|---------------------------------------|------------|---------------|---------------|------------|---------------|
| <b>0-fold sites</b>                   |            |               |               |            |               |
| $\pi$ : test statistic                | -0.07      | 0.01          | -0.07         | 0.01       | -0.02         |
| $\pi$ : > 0 (%)                       | 5.84       | 83.10         | <b>0.04</b>   | 75.68      | 14.60         |
| $\pi$ : $P$ -value.                   | 0.140      | 0.340         | <b>0.024*</b> | 0.508      | 0.311         |
| Watterson's $\theta$ : test statistic | -0.09      | 0.02          | -0.09         | 0.02       | -0.04         |
| Watterson's $\theta$ : > 0 (%)        | 3.71       | 88.83         | <b>0.03</b>   | 76.02      | 6.53          |
| Watterson's $\theta$ : $P$ -value     | 0.092      | 0.184         | <b>0.012*</b> | 0.497      | 0.168         |
| Tajima's D: test statistic            | -4.25      | -8.01         | -2.38         | 0.69       | 5.44          |
| Tajima's D: > 0 (%)                   | 30.29      | <b>0.76</b>   | 33.12         | 58.16      | 94.66         |
| Tajima's D: $P$ -value                | 0.599      | <b>0.024*</b> | 0.643         | 0.859      | 0.098         |
| $F_{ST}$ : test statistic             | NA         | NA            | NA            | NA         | NA            |
| $F_{ST}$ : > 0 (%)                    | NA         | NA            | NA            | NA         | NA            |
| $F_{ST}$ : $P$ -value                 | NA         | NA            | NA            | NA         | NA            |
| <b>4-fold sites</b>                   |            |               |               |            |               |
| $\pi$ : test statistic                | -0.11      | -0.04         | -0.14         | 0.03       | 0.03          |
| $\pi$ : > 0 (%)                       | 16.18      | 21.16         | 2.55          | 72.58      | 71.43         |
| $\pi$ : $P$ -value.                   | 0.327      | 0.419         | 0.059         | 0.564      | 0.596         |
| Watterson's $\theta$ : test statistic | -0.09      | -0.01         | -0.10         | 0.06       | -0.04         |
| Watterson's $\theta$ : > 0 (%)        | 23.48      | 44.04         | 9.57          | 80.66      | 25.65         |
| Watterson's $\theta$ : $P$ -value     | 0.467      | 0.856         | 0.192         | 0.387      | 0.510         |
| Tajima's D: test statistic            | -8.60      | -4.41         | -10.33        | -1.07      | 7.21          |
| Tajima's D: > 0 (%)                   | 13.10      | 9.24          | <b>1.87</b>   | 38.65      | <b>98.87</b>  |
| Tajima's D: $P$ -value                | 0.262      | 0.189         | <b>0.043*</b> | 0.760      | <b>0.015*</b> |
| $F_{ST}$ : test statistic             | NA         | NA            | NA            | NA         | NA            |
| $F_{ST}$ : > 0 (%)                    | NA         | NA            | NA            | NA         | NA            |
| $F_{ST}$ : $P$ -value                 | NA         | NA            | NA            | NA         | NA            |

858

859 **Table 2.** Population genetic statistics of immune genes in the Florida population using the paired-  
 860 control approach. The upper half shows results based on the 0-fold sites and the lower half shows  
 861 results based on the 4-fold sites.  $F_{ST}$  was compared to the North American population. “All immune”  
 862 indicates the full immune gene set. In each statistic, the first row shows the test statistic of the  
 863 immune gene group. The second row shows the proportion of 10,000 permutations in which the  
 864 difference between the means of the immune gene group and the control set was positive.  
 865 Percentages < 2.5% and > 97.5 % are labeled in bold. The third row shows the  $P$ -value.  $P$ -values  
 866 < 0.05 are labeled in bold. Asterisks indicate: \* < 0.05, \*\* < 0.01, \*\*\* < 0.001.

|                                       | All Immune | Recognition    | Signaling     | Modulation | Effector       |
|---------------------------------------|------------|----------------|---------------|------------|----------------|
| <b>0-fold sites</b>                   |            |                |               |            |                |
| $\pi$ : test statistic                | -0.07      | 0.01           | -0.07         | 0.01       | -0.03          |
| $\pi$ : > 0 (%)                       | 4.54       | 78.83          | <b>0.05</b>   | 76.22      | 13.21          |
| $\pi$ : $P$ -value.                   | 0.118      | 0.461          | <b>0.025*</b> | 0.498      | 0.291          |
| Watterson's $\theta$ : test statistic | -0.08      | 0.02           | -0.08         | 0.01       | -0.03          |
| Watterson's $\theta$ : > 0 (%)        | 3.44       | 82.81          | <b>0.07</b>   | 73.52      | 5.98           |
| Watterson's $\theta$ : $P$ -value     | 0.090      | 0.346          | <b>0.021*</b> | 0.558      | 0.161          |
| Tajima's D: test statistic            | -5.02      | -6.80          | -11.83        | 1.14       | 12.46          |
| Tajima's D: > 0 (%)                   | 29.28      | 3.40           | 2.78          | 60.66      | <b>99.91</b>   |
| Tajima's D: $P$ -value                | 0.594      | 0.077          | 0.062         | 0.794      | <b>0.001**</b> |
| $F_{ST}$ : test statistic             | 0.59       | 0.53           | 0.14          | 0.03       | -0.11          |
| $F_{ST}$ : > 0 (%)                    | 94.37      | <b>99.84</b>   | 71.61         | 61.59      | 18.02          |
| $F_{ST}$ : $P$ -value                 | 0.098      | <b>0.002**</b> | 0.575         | 0.837      | 0.349          |
| <b>4-fold sites</b>                   |            |                |               |            |                |
| $\pi$ : test statistic                | -0.05      | -0.01          | -0.13         | 0.06       | 0.02           |
| $\pi$ : > 0 (%)                       | 34.57      | 44.02          | 3.79          | 85.30      | 66.74          |
| $\pi$ : $P$ -value.                   | 0.683      | 0.868          | 0.090         | 0.294      | 0.706          |
| Watterson's $\theta$ : test statistic | 0.00       | 0.02           | -0.10         | 0.09       | -0.02          |
| Watterson's $\theta$ : > 0 (%)        | 50.89      | 69.13          | 10.34         | 93.40      | 38.79          |
| Watterson's $\theta$ : $P$ -value     | 0.979      | 0.629          | 0.209         | 0.129      | 0.764          |
| Tajima's D: test statistic            | -9.01      | -4.80          | -7.70         | -2.76      | 6.26           |
| Tajima's D: > 0 (%)                   | 14.05      | 5.21           | 7.91          | 25.61      | 95.51          |
| Tajima's D: $P$ -value                | 0.281      | 0.107          | 0.165         | 0.501      | 0.083          |
| $F_{ST}$ : test statistic             | -0.22      | -0.12          | 0.05          | -0.14      | -0.02          |
| $F_{ST}$ : > 0 (%)                    | 24.36      | 15.97          | 61.89         | 15.73      | 45.88          |
| $F_{ST}$ : $P$ -value                 | 0.470      | 0.321          | 0.810         | 0.314      | 0.849          |

867

868 **Table 3.** Population genetic statistics of immune genes in the Pacific population using the paired-  
 869 control approach. The upper half shows results based on the 0-fold sites and the lower half shows  
 870 results based on the 4-fold sites.  $F_{ST}$  was compared to the North American population. “All immune”  
 871 indicates the full immune gene set. In each statistic, the first row shows the test statistic of the  
 872 immune gene group. The second row shows the proportion of 10,000 permutations in which the  
 873 difference between the means of the immune gene group and the control set was positive.  
 874 Percentages < 2.5% and > 97.5 % are labeled in bold. The third row shows the  $P$ -value.  $P$ -values  
 875 < 0.05 are labeled in bold. Asterisks indicate: \* < 0.05, \*\* < 0.01, \*\*\* < 0.001.

|                                       | All Immune | Recognition | Signaling      | Modulation | Effector |
|---------------------------------------|------------|-------------|----------------|------------|----------|
| <b>0-fold sites</b>                   |            |             |                |            |          |
| $\pi$ : test statistic                | -0.05      | 0.02        | -0.06          | 0.01       | -0.02    |
| $\pi$ : > 0 (%)                       | 11.28      | 90.28       | <b>0.09</b>    | 72.45      | 32.43    |
| $\pi$ : $P$ -value.                   | 0.239      | 0.139       | <b>0.032*</b>  | 0.598      | 0.546    |
| Watterson's $\theta$ : test statistic | -0.04      | 0.02        | -0.05          | 0.01       | -0.01    |
| Watterson's $\theta$ : > 0 (%)        | 9.07       | 96.35       | <b>0.04</b>    | 71.41      | 24.07    |
| Watterson's $\theta$ : $P$ -value     | 0.205      | 0.039       | <b>0.022*</b>  | 0.614      | 0.433    |
| Tajima's D: test statistic            | 0.56       | -1.27       | -4.04          | 3.50       | 2.38     |
| Tajima's D: > 0 (%)                   | 51.93      | 39.59       | 27.39          | 73.21      | 69.72    |
| Tajima's D: $P$ -value                | 0.963      | 0.798       | 0.545          | 0.539      | 0.604    |
| $F_{ST}$ : test statistic             | 0.88       | 0.67        | 0.75           | -0.19      | -0.35    |
| $F_{ST}$ : > 0 (%)                    | 77.94      | 88.78       | 87.07          | 39.64      | 26.83    |
| $F_{ST}$ : $P$ -value                 | 0.457      | 0.216       | 0.255          | 0.758      | 0.513    |
| <b>4-fold sites</b>                   |            |             |                |            |          |
| $\pi$ : test statistic                | -0.13      | -0.04       | -0.16          | 0.01       | 0.06     |
| $\pi$ : > 0 (%)                       | 11.68      | 16.31       | <b>0.55</b>    | 59.01      | 86.68    |
| $\pi$ : $P$ -value.                   | 0.239      | 0.320       | <b>0.016*</b>  | 0.844      | 0.251    |
| Watterson's $\theta$ : test statistic | -0.10      | -0.02       | -0.14          | 0.02       | 0.04     |
| Watterson's $\theta$ : > 0 (%)        | 10.54      | 23.08       | <b>0.16</b>    | 68.92      | 84.08    |
| Watterson's $\theta$ : $P$ -value     | 0.218      | 0.443       | <b>0.006**</b> | 0.635      | 0.313    |
| Tajima's D: test statistic            | -1.13      | -2.10       | 4.99           | -4.25      | 0.22     |
| Tajima's D: > 0 (%)                   | 46.02      | 31.94       | 78.49          | 21.43      | 51.46    |
| Tajima's D: $P$ -value                | 0.916      | 0.633       | 0.427          | 0.423      | 0.960    |
| $F_{ST}$ : test statistic             | -1.42      | -0.58       | -0.32          | -0.33      | -0.19    |
| $F_{ST}$ : > 0 (%)                    | 9.24       | 6.90        | 31.19          | 31.71      | 37.14    |
| $F_{ST}$ : $P$ -value                 | 0.195      | 0.158       | 0.599          | 0.606      | 0.694    |

876



877 **Table 4.** Population genetic statistics of immune genes in the Atlantic population using the paired-  
 878 control approach. The upper half shows results based on the 0-fold sites and the lower half shows  
 879 results based on the 4-fold sites.  $F_{ST}$  was compared to the North American population. “All immune”  
 880 indicates the full immune gene set. In each statistic, the first row shows the test statistic of the  
 881 immune gene group. The second row shows the proportion of 10,000 permutations in which the  
 882 difference between the means of the immune gene group and the control set was positive.  
 883 Percentages < 2.5% and > 97.5 % are labeled in bold. The third row shows the  $P$ -value.  $P$ -values  
 884 < 0.05 are labeled in bold. Asterisks indicate: \* < 0.05, \*\* < 0.01, \*\*\* < 0.001.

|                                       | All Immune    | Recognition | Signaling      | Modulation | Effector |
|---------------------------------------|---------------|-------------|----------------|------------|----------|
| <b>0-fold sites</b>                   |               |             |                |            |          |
| $\pi$ : test statistic                | -0.06         | 0.01        | -0.06          | 0.02       | -0.02    |
| $\pi$ : > 0 (%)                       | 5.51          | 77.01       | <b>0.03</b>    | 82.50      | 11.93    |
| $\pi$ : $P$ -value.                   | 0.142         | 0.567       | <b>0.032*</b>  | 0.346      | 0.280    |
| Watterson's $\theta$ : test statistic | -0.05         | 0.01        | -0.05          | 0.01       | -0.02    |
| Watterson's $\theta$ : > 0 (%)        | 6.29          | 77.86       | <b>0.09</b>    | 83.54      | 10.69    |
| Watterson's $\theta$ : $P$ -value     | 0.151         | 0.517       | <b>0.026*</b>  | 0.327      | 0.262    |
| Tajima's D: test statistic            | -25.41        | -1.59       | -20.34         | -1.48      | -2.00    |
| Tajima's D: > 0 (%)                   | <b>1.89</b>   | 39.22       | <b>0.34</b>    | 41.69      | 32.56    |
| Tajima's D: $P$ -value                | <b>0.040*</b> | 0.775       | <b>0.008**</b> | 0.823      | 0.658    |
| $F_{ST}$ : test statistic             | 1.14          | 0.46        | 1.03           | 0.71       | -1.06    |
| $F_{ST}$ : > 0 (%)                    | 80.35         | 79.38       | 90.02          | 84.53      | 2.68     |
| $F_{ST}$ : $P$ -value                 | 0.403         | 0.427       | 0.192          | 0.303      | 0.075    |
| <b>4-fold sites</b>                   |               |             |                |            |          |
| $\pi$ : test statistic                | -0.01         | -0.04       | -0.06          | 0.03       | 0.06     |
| $\pi$ : > 0 (%)                       | 47.29         | 9.14        | 20.01          | 73.74      | 89.11    |
| $\pi$ : $P$ -value.                   | 0.922         | 0.191       | 0.389          | 0.536      | 0.206    |
| Watterson's $\theta$ : test statistic | 0.01          | -0.03       | -0.04          | 0.04       | 0.03     |
| Watterson's $\theta$ : > 0 (%)        | 53.52         | 15.93       | 26.19          | 81.28      | 78.35    |
| Watterson's $\theta$ : $P$ -value     | 0.950         | 0.315       | 0.509          | 0.377      | 0.446    |
| Tajima's D: test statistic            | -16.20        | -6.92       | -7.33          | -5.96      | 4.00     |
| Tajima's D: > 0 (%)                   | 8.46          | 8.13        | 17.00          | 15.96      | 81.88    |
| Tajima's D: $P$ -value                | 0.164         | 0.156       | 0.337          | 0.314      | 0.369    |
| $F_{ST}$ : test statistic             | 0.65          | 0.16        | 1.26           | -0.41      | -0.35    |
| $F_{ST}$ : > 0 (%)                    | 71.55         | 64.06       | 95.15          | 24.18      | 24.04    |
| $F_{ST}$ : $P$ -value                 | 0.573         | 0.739       | 0.084          | 0.466      | 0.459    |

885



886 **Table 5.** Contingency tables of Tajima's  $D - F_{ST}$  outliers for each immune functional class.  
 887 Numbers are counts of genes for each category. Q1 – Q4 categories represent the four quadrants  
 888 shown in each Figure 8 plot (Q1 = top-right, Q2 = top-left, Q3 = bottom-left, Q4 = bottom-right).  
 889 NS category represents non-outliers (i.e., the area within dotted gray lines).  $P$ -values from Fisher  
 890 exact tests for each contingency table are shown in the last column. The North American population  
 891 was not used because it was the reference group and did not have  $F_{ST}$  data.

| Gene class  | Sites  | Population | Q1 | Q2 | Q3 | Q4 | NS | $P$ -value |
|-------------|--------|------------|----|----|----|----|----|------------|
| Recognition | 0-fold | Florida    | 1  | 2  | 0  | 0  | 16 | 0.550      |
|             |        | Pacific    | 2  | 0  | 0  | 0  | 17 |            |
|             |        | Atlantic   | 0  | 1  | 0  | 0  | 18 |            |
| Signaling   | 0-fold | Florida    | 2  | 2  | 1  | 0  | 36 | 0.923      |
|             |        | Pacific    | 1  | 1  | 2  | 0  | 37 |            |
|             |        | Atlantic   | 0  | 2  | 2  | 0  | 37 |            |
| Modulation  | 0-fold | Florida    | 0  | 2  | 1  | 0  | 25 | 1.000      |
|             |        | Pacific    | 1  | 1  | 0  | 0  | 26 |            |
|             |        | Atlantic   | 1  | 1  | 1  | 0  | 25 |            |
| Effector    | 0-fold | Florida    | 0  | 0  | 0  | 2  | 12 | 0.761      |
|             |        | Pacific    | 0  | 0  | 0  | 0  | 14 |            |
|             |        | Atlantic   | 0  | 0  | 0  | 1  | 13 |            |
| Recognition | 4-fold | Florida    | 0  | 0  | 0  | 0  | 19 | 0.766      |
|             |        | Pacific    | 0  | 0  | 1  | 0  | 18 |            |
|             |        | Atlantic   | 1  | 1  | 0  | 0  | 17 |            |
| Signaling   | 4-fold | Florida    | 0  | 2  | 4  | 1  | 34 | 0.182      |
|             |        | Pacific    | 1  | 1  | 0  | 1  | 38 |            |
|             |        | Atlantic   | 3  | 3  | 1  | 0  | 34 |            |
| Modulation  | 4-fold | Florida    | 0  | 0  | 0  | 0  | 28 | 1.000      |
|             |        | Pacific    | 0  | 0  | 0  | 0  | 28 |            |
|             |        | Atlantic   | 0  | 1  | 0  | 0  | 27 |            |
| Effector    | 4-fold | Florida    | 0  | 0  | 0  | 2  | 12 | 0.365      |
|             |        | Pacific    | 0  | 0  | 0  | 0  | 14 |            |
|             |        | Atlantic   | 0  | 1  | 1  | 1  | 11 |            |

892

893 **Table 6.** Contingency tables of Tajima’s  $D - F_{ST}$  outliers for each population. Numbers are counts  
 894 of genes for each category. Q1 – Q4 categories represent the four quadrants shown in each Figure  
 895 8 plot (Q1 = top-right, Q2 = top-left, Q3 = bottom-left, Q4 = bottom-right). NS category represents  
 896 non-outliers (i.e., the area within dotted gray lines).  $P$ -values from Fisher exact tests for each  
 897 contingency table are shown in the last column. In the North American population, the analyses  
 898 were based on only the Tajima’s  $D$  data. Q1 represents “right area” and Q2 represents “left area”.  
 899 Q3 and Q4 were thus non-applicable.

| Population    | Sites  | Gene class  | Q1 | Q2 | Q3 | Q4 | NS | $P$ -value |
|---------------|--------|-------------|----|----|----|----|----|------------|
| North America | 0-fold | Recognition | 0  | 0  | NA | NA | 19 | 1.000      |
|               |        | Signaling   | 0  | 2  | NA | NA | 39 |            |
|               |        | Modulation  | 0  | 1  | NA | NA | 27 |            |
|               |        | Effector    | 0  | 0  | NA | NA | 14 |            |
| Florida       | 0-fold | Recognition | 1  | 2  | 0  | 0  | 16 | 0.374      |
|               |        | Signaling   | 2  | 2  | 1  | 0  | 36 |            |
|               |        | Modulation  | 0  | 2  | 1  | 0  | 25 |            |
|               |        | Effector    | 0  | 0  | 0  | 2  | 12 |            |
| Pacific       | 0-fold | Recognition | 2  | 0  | 0  | 0  | 17 | 0.820      |
|               |        | Signaling   | 1  | 1  | 2  | 0  | 37 |            |
|               |        | Modulation  | 1  | 1  | 0  | 0  | 26 |            |
|               |        | Effector    | 0  | 0  | 0  | 0  | 14 |            |
| Atlantic      | 0-fold | Recognition | 0  | 1  | 0  | 0  | 18 | 0.819      |
|               |        | Signaling   | 0  | 2  | 2  | 0  | 37 |            |
|               |        | Modulation  | 1  | 1  | 1  | 0  | 25 |            |
|               |        | Effector    | 0  | 0  | 0  | 1  | 13 |            |
| North America | 4-fold | Recognition | 0  | 0  | NA | NA | 19 | 0.105      |
|               |        | Signaling   | 0  | 2  | NA | NA | 39 |            |
|               |        | Modulation  | 0  | 1  | NA | NA | 27 |            |
|               |        | Effector    | 2  | 0  | NA | NA | 12 |            |
| Florida       | 4-fold | Recognition | 0  | 0  | 0  | 0  | 19 | 0.092      |
|               |        | Signaling   | 0  | 2  | 4  | 1  | 34 |            |
|               |        | Modulation  | 0  | 0  | 0  | 0  | 28 |            |
|               |        | Effector    | 0  | 0  | 0  | 2  | 12 |            |
| Pacific       | 4-fold | Recognition | 0  | 0  | 1  | 0  | 18 | 0.833      |
|               |        | Signaling   | 1  | 1  | 0  | 1  | 38 |            |
|               |        | Modulation  | 0  | 0  | 0  | 0  | 28 |            |
|               |        | Effector    | 0  | 0  | 0  | 0  | 14 |            |
| Atlantic      | 4-fold | Recognition | 1  | 1  | 0  | 0  | 17 | 0.489      |
|               |        | Signaling   | 3  | 3  | 1  | 0  | 34 |            |
|               |        | Modulation  | 0  | 1  | 0  | 0  | 27 |            |
|               |        | Effector    | 0  | 1  | 1  | 1  | 11 |            |

901 **Table 7.** Summary of immune genes that are outliers according to Tajima's D at the 0-fold sites. Outliers were defined as < 2.5<sup>th</sup>  
902 percentile or > 97.5<sup>th</sup> percentile of the genome background. A gene was reported as an outlier when it met the criteria in at least  
903 one of the populations. The Tajima's D value of the 0-fold sites and the 4-fold sites of each outlier gene are shown. Values that are  
904 less than or equal to the genome median (i.e., 50<sup>th</sup> percentile) are underscored; values that are greater than the genome median are  
905 in italics. Values that are outliers are in bold. Genes that are reported as outliers in both Tajima's D and  $F_{ST}$  (Table 8) are colored  
906 in red. A Tajima's D value close to 0 indicates neutrality. A more negative Tajima's D value represents an excess of low-frequency  
907 polymorphisms than expectation, which indicates directional selection or population expansion. A more positive Tajima's D value  
908 represents low levels of both low- and high-frequency polymorphisms, which indicates balancing selection or population  
909 contraction.

| Gene name           | Gene number        | Functional class            | <u>North America</u> |                     | <u>Florida</u>      |              | <u>Pacific</u>      |                    | <u>Atlantic</u>     |                     |
|---------------------|--------------------|-----------------------------|----------------------|---------------------|---------------------|--------------|---------------------|--------------------|---------------------|---------------------|
|                     |                    |                             | 0-fold               | 4-fold              | 0-fold              | 4-fold       | 0-fold              | 4-fold             | 0-fold              | 4-fold              |
| BGRP-like           | DPOGS212941        | Recognition                 | <u>-1.74</u>         | <u>-1.93</u>        | <u>-1.90</u>        | <u>-2.13</u> | <i>0.59</i>         | <u>0.05</u>        | <b><u>-2.66</u></b> | <u>-0.72</u>        |
| CLIP-like           | DPOGS204835        | Modulation                  | <u>-2.42</u>         | <b><u>-2.28</u></b> | <u>-1.79</u>        | <u>-1.72</u> | <i>0.07</i>         | <u>0.40</u>        | <b><u>-2.72</u></b> | <i>0.06</i>         |
| CLIP-like           | DPOGS204146        | Modulation                  | <i>-1.13</i>         | <u>-1.17</u>        | <i>-0.37</i>        | <u>-1.30</u> | <b><u>-2.08</u></b> | <u>-0.14</u>       | <b><u>2.67</u></b>  | <u>-0.20</u>        |
| CLIP-like           | DPOGS208169        | Modulation                  | <b><u>-2.54</u></b>  | <i>-0.91</i>        | <u>-2.21</u>        | <i>-0.67</i> | <u>-0.67</u>        | <u>-0.19</u>       | <u>-0.26</u>        | <i>1.90</i>         |
| CLIP-like           | DPOGS211355        | Modulation                  | <u>-2.01</u>         | <u>-1.81</u>        | <b><u>-2.67</u></b> | <u>-1.56</u> | <u>-0.53</u>        | <u>-0.03</u>       | <u>-0.32</u>        | <i>0.74</i>         |
| CLIP-like           | DPOGS214570        | Modulation                  | <u>-1.43</u>         | <i>-0.79</i>        | <i>-0.21</i>        | <i>0.26</i>  | <b><u>2.44</u></b>  | <i>0.72</i>        | <u>-0.69</u>        | <u>-0.78</u>        |
| CLIP-like           | DPOGS206224        | Modulation                  | <u>-2.30</u>         | <u>-1.31</u>        | <b><u>-2.64</u></b> | <u>-1.78</u> | <i>-0.06</i>        | <u>-0.39</u>       | <u>-0.98</u>        | <u>-1.49</u>        |
| CLIP-like           | DPOGS205206        | Modulation                  | <i>-0.81</i>         | <u>-1.28</u>        | <b><u>-2.59</u></b> | <u>-1.62</u> | <u>-0.92</u>        | <i>1.17</i>        | <u>-1.25</u>        | <i>0.04</i>         |
| Toll-like receptors | DPOGS205295        | Signaling - Toll            | <b><u>-2.60</u></b>  | <i>-0.80</i>        | <b><u>-2.77</u></b> | <i>0.31</i>  | <u>-0.97</u>        | <i>0.88</i>        | <i>0.33</i>         | <i>1.19</i>         |
| <b>MyD88</b>        | <b>DPOGS205936</b> | <b>Signaling - Toll</b>     | <i>-0.29</i>         | <i>-0.61</i>        | <i>-0.07</i>        | <i>-0.43</i> | <i>0.99</i>         | <b><u>2.50</u></b> | <b><u>-2.21</u></b> | <b><u>-2.45</u></b> |
| Pellino             | DPOGS214647        | Signaling - Toll            | <i>-0.95</i>         | <u>-1.88</u>        | <b><u>-2.60</u></b> | <u>-1.37</u> | <b><u>2.54</u></b>  | <i>0.83</i>        | <u>-0.46</u>        | <u>-1.09</u>        |
| Hem                 | DPOGS208954        | Signaling - JNK             | <u>-1.42</u>         | <i>-0.80</i>        | <u>-1.54</u>        | <u>-1.34</u> | <b><u>-1.98</u></b> | <u>0.70</u>        | <u>-0.62</u>        | <u>-0.06</u>        |
| <b>PIAS</b>         | <b>DPOGS214325</b> | <b>Signaling - JAK-STAT</b> | <i>-1.58</i>         | <u>-1.09</u>        | <i>-1.40</i>        | <u>-1.37</u> | <b><u>-1.93</u></b> | <i>0.87</i>        | <u>-0.30</u>        | <i>1.57</i>         |
| DOMELESS            | DPOGS200349        | Signaling - JAK-STAT        | <b><u>-2.79</u></b>  | <i>-0.18</i>        | <b><u>-2.68</u></b> | <i>-0.08</i> | <u>-1.24</u>        | <i>1.70</i>        | <u>-0.83</u>        | <i>0.73</i>         |

| Gene name    | Gene number | Functional class | <u>North America</u> |                     | <u>Florida</u>     |                     | <u>Pacific</u>      |                     | <u>Atlantic</u>     |                            |
|--------------|-------------|------------------|----------------------|---------------------|--------------------|---------------------|---------------------|---------------------|---------------------|----------------------------|
|              |             |                  | 0-fold               | 4-fold              | 0-fold             | 4-fold              | 0-fold              | 4-fold              | 0-fold              | 4-fold                     |
| Attacin-Like | DPOGS213997 | Effector         | <i>0.23</i>          | <i>-0.22</i>        | <b><i>2.03</i></b> | <u><i>-1.00</i></u> | <i>2.06</i>         | <i>0.82</i>         | <i>1.83</i>         | <i>0.52</i>                |
| PPO-like     | DPOGS200017 | Effector         | <i>-0.74</i>         | <u><i>-1.30</i></u> | <b><i>1.62</i></b> | <u><i>-1.19</i></u> | <u><i>-1.48</i></u> | <u><i>-0.42</i></u> | <u><i>-0.38</i></u> | <u><b><i>-2.43</i></b></u> |

910

911 **Table 8.** Summary of immune genes that are outliers according to  $F_{ST}$  at the 0-fold sites. Outliers were defined as  $< 2.5^{\text{th}}$  percentile  
912 or  $> 97.5^{\text{th}}$  percentile of the genome background. A gene was reported as an outlier when it met the criteria in at least one of the  
913 population pairs. The  $F_{ST}$  value of the 0-fold sites and the 4-fold sites of each outlier gene are shown. Values that are less than or  
914 equal to the genome median (i.e.,  $50^{\text{th}}$  percentile) are underscored; values that are greater than the genome median are in italics.  
915 Values that are outliers are in bold. Genes that are reported as outliers in both Tajima's D (Table 7) and  $F_{ST}$  are colored in red.  $F_{ST}$   
916 is a measure of population differentiation due to genetic structure, with a value ranging from 0 to 1. An  $F_{ST}$  value equals to zero  
917 indicates no differentiation. An  $F_{ST}$  value equals to one indicates complete differentiation; different alleles are fixed in different  
918 populations.

| Gene name           | Gene number        | Functional class            | Florida – North America |                     | Pacific – North America |             | Atlantic – North America |                    |
|---------------------|--------------------|-----------------------------|-------------------------|---------------------|-------------------------|-------------|--------------------------|--------------------|
|                     |                    |                             | 0-fold                  | 4-fold              | 0-fold                  | 4-fold      | 0-fold                   | 4-fold             |
| BGRP-like           | DPOGS212940        | Recognition                 | <i><b>0.14</b></i>      | <u>0.02</u>         | <i>0.20</i>             | <u>0.12</u> | <i>0.14</i>              | <u>0.03</u>        |
| Class B-like SCR    | DPOGS203180        | Recognition                 | <i><b>0.12</b></i>      | <u>0.01</u>         | <i>0.17</i>             | <u>0.10</u> | <i>0.15</i>              | <u>0.11</u>        |
| Other SCR           | DPOGS214397        | Recognition                 | <i><b>0.15</b></i>      | <i>0.05</i>         | <u>0.07</u>             | <i>0.20</i> | <i>0.46</i>              | <i>0.30</i>        |
| NIM-like            | DPOGS210210        | Recognition                 | <i>0.06</i>             | <i>0.04</i>         | <i><b>0.48</b></i>      | <i>0.20</i> | <i>0.28</i>              | <u>0.09</u>        |
| NIM-like            | DPOGS210211        | Recognition                 | <i>0.04</i>             | <i>0.05</i>         | <i><b>0.50</b></i>      | <i>0.43</i> | <i>0.25</i>              | <i>0.30</i>        |
| CLIP-like           | DPOGS215098        | Modulation                  | <i>0.04</i>             | <i>0.03</i>         | <i>0.15</i>             | <i>0.15</i> | <i><b>0.57</b></i>       | <i><b>0.48</b></i> |
| SPZ-like            | DPOGS209810        | Signaling - Toll            | <u>0.02</u>             | <u><b>-0.01</b></u> | <u>0.03</u>             | <u>0.03</u> | <u><b>0.00</b></u>       | <u>0.06</u>        |
| <b>MyD88</b>        | <b>DPOGS205936</b> | <b>Signaling - Toll</b>     | <i><b>0.14</b></i>      | <i>0.10</i>         | <i>0.27</i>             | <i>0.17</i> | <i>0.35</i>              | <i>0.24</i>        |
| JNK                 | DPOGS213169        | Signaling - JNK             | <i><b>0.16</b></i>      | <i><b>0.26</b></i>  | <u>0.06</u>             | <i>0.15</i> | <u>0.02</u>              | <u>0.03</u>        |
| <b>PIAS</b>         | <b>DPOGS214325</b> | <b>Signaling - JAK-STAT</b> | <u>0.00</u>             | <u>0.01</u>         | <u>0.05</u>             | <i>0.21</i> | <u><b>-0.01</b></u>      | <u>0.08</u>        |
| Stat                | DPOGS212956        | Signaling - JAK-STAT        | <i>0.04</i>             | <i>0.06</i>         | <i><b>0.86</b></i>      | <i>0.29</i> | <i><b>0.80</b></i>       | <i><b>0.64</b></i> |
| <b>Attacin-Like</b> | <b>DPOGS213997</b> | <b>Effector</b>             | <u><b>-0.02</b></u>     | <u>0.00</u>         | <i>0.17</i>             | <i>0.21</i> | <u><b>-0.02</b></u>      | <i>0.15</i>        |

919

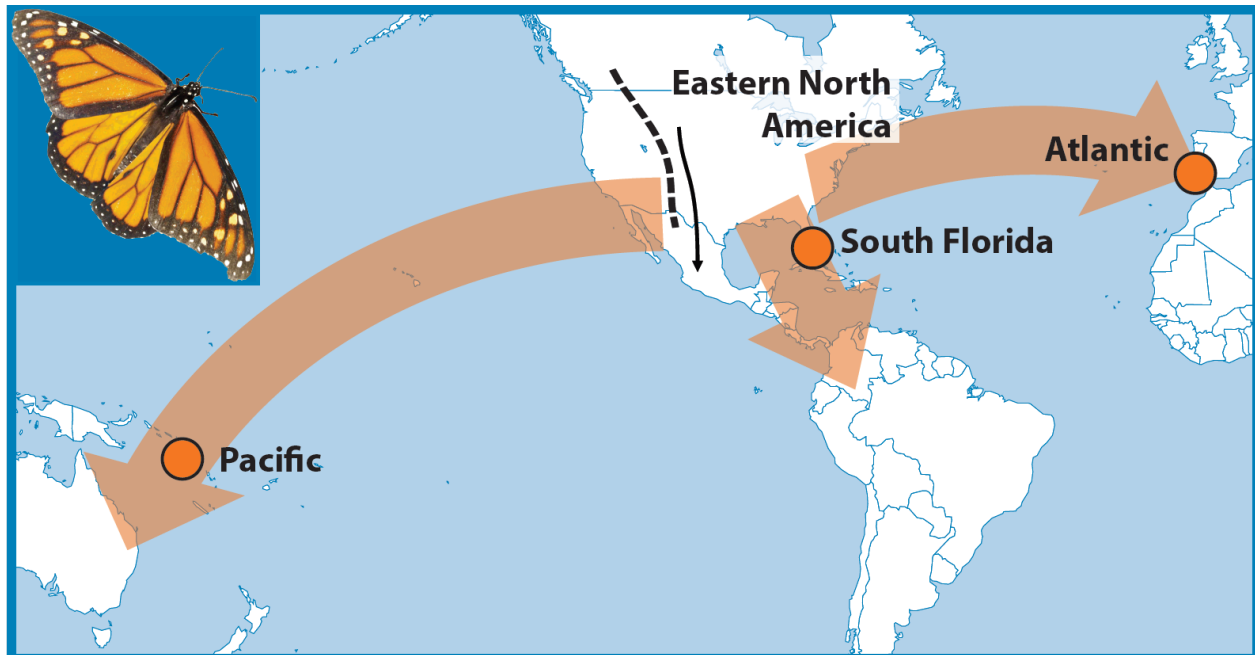

920  
921 **Figure 1.** Current distribution of monarch butterflies around the world and their historical dispersal  
922 routes. Monarchs originated in the North America and established other populations via three main  
923 dispersal events: across the Pacific Ocean, across the Atlantic Ocean, and toward Central/South  
924 America.

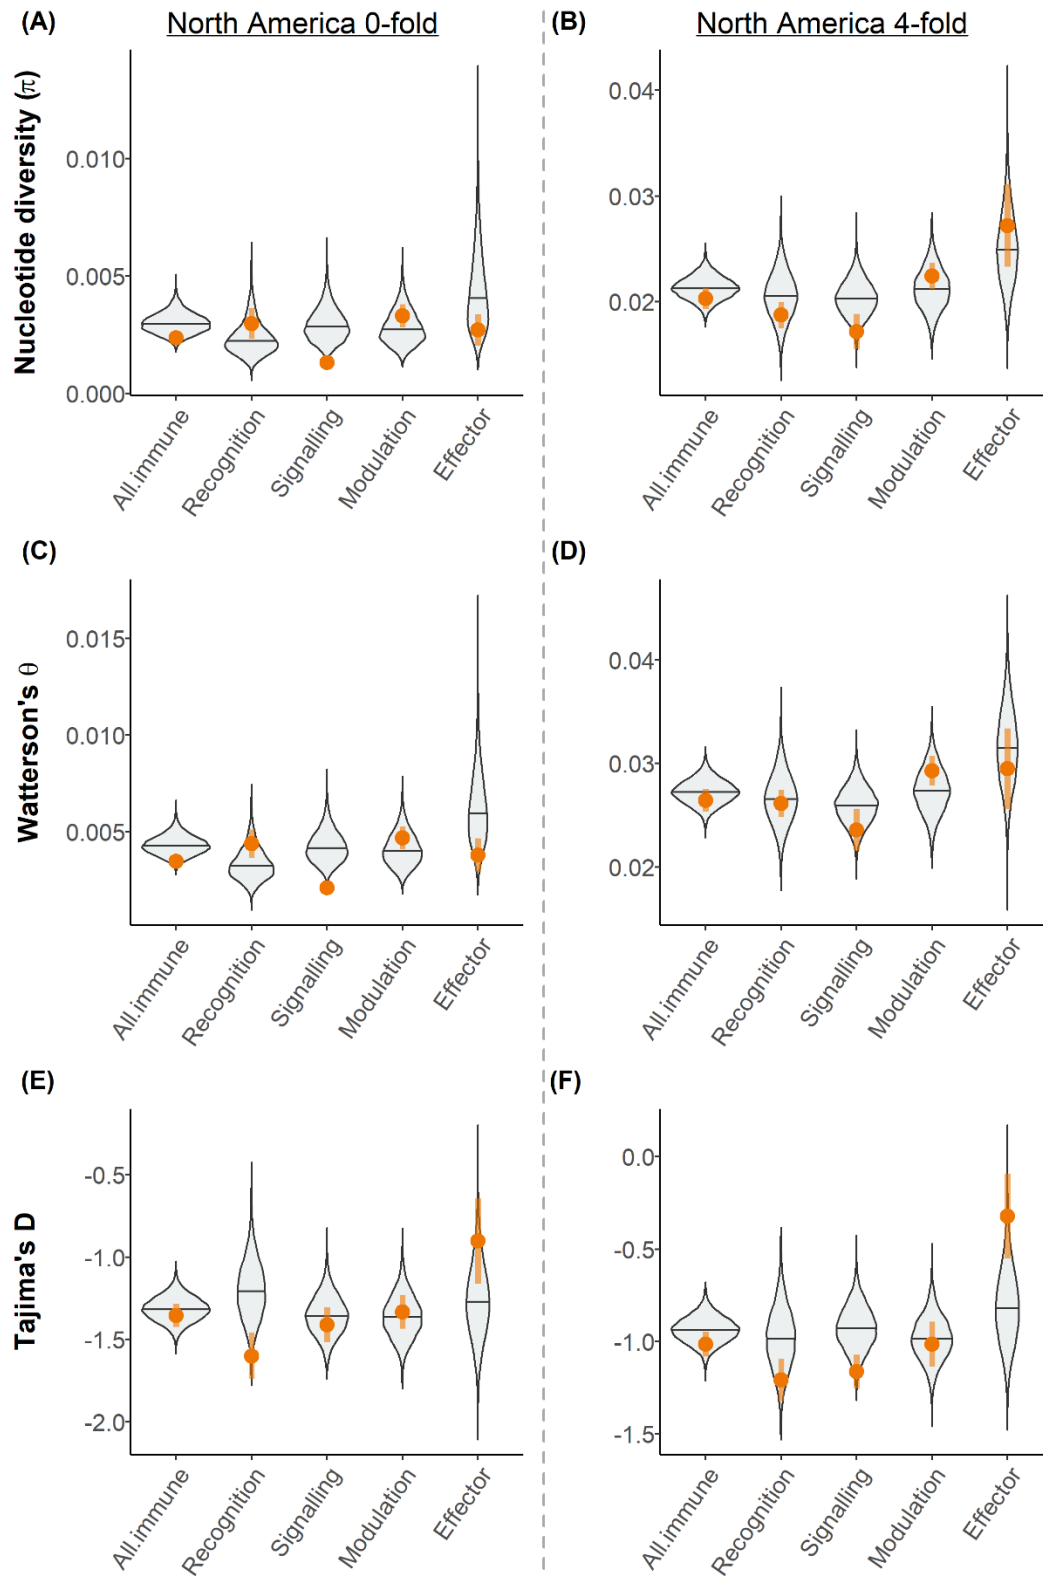

925  
926

**Figure 2.** Population genetic statistics of immune genes in the North American population using

927 the paired-control approach. 0-fold sites shown in (A), (C), (E) and 4-fold sites shown in (B), (D),  
928 (F). (A)-(B): Nucleotide diversity ( $\pi$ ); (C)-(D): Watterson's  $\theta$ ; (E)- (F): Tajima's D. Each immune  
929 gene group was compared to selected pair-control sets. Violin plots show the distribution of the  
930 mean of each control set generated with 10, 000 permutations. The orange dots and vertical lines  
931 indicate mean  $\pm 1$  SEM of the immune gene group of interest.  
932



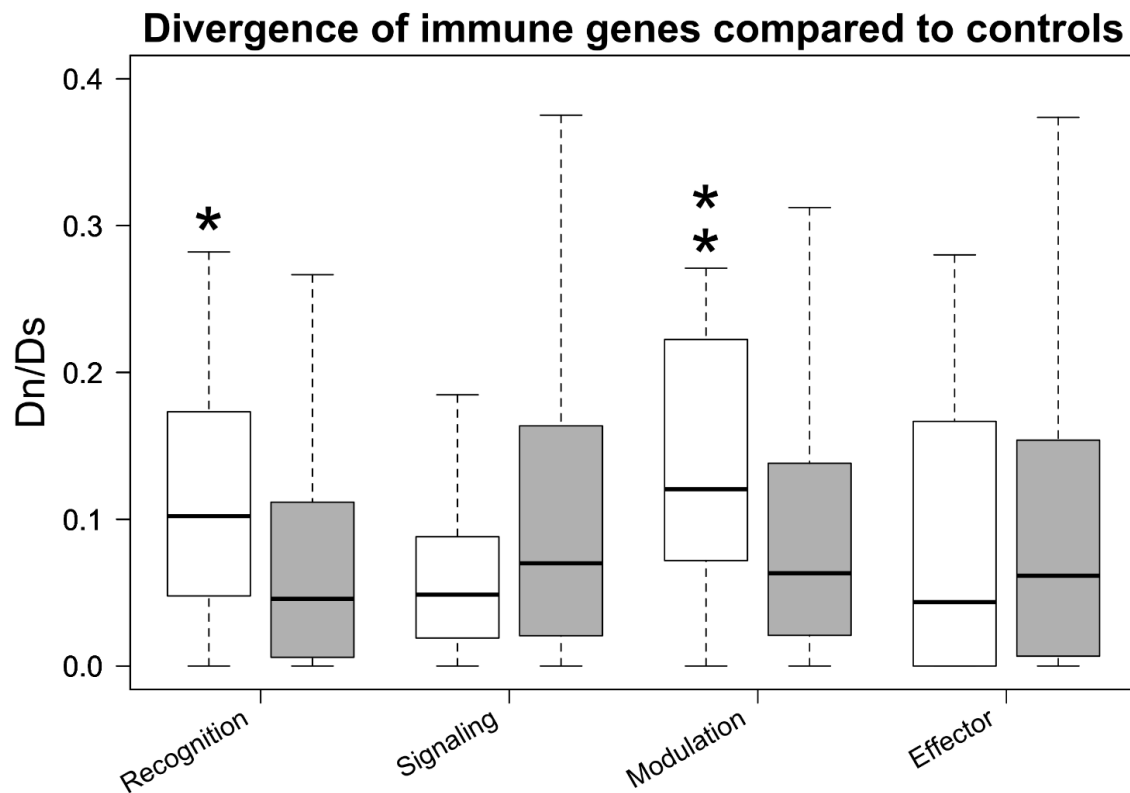

933  
934 **Figure 3.** Divergence rates compared for immune genes and paired-controls using the queen  
935 butterfly as a reference. Here Dn is calculated as non-synonymous substitutions per non-  
936 synonymous site, and Ds is the number of synonymous substitutions per synonymous site. Rates  
937 for each gene class are labeled, with the control group in grey immediately to right. Asterisks  
938 represent levels of significance in a Mann-Whitney-U Test following the convention: \* for <math><0.05</math>  
939 and \*\* <math><0.01</math>.

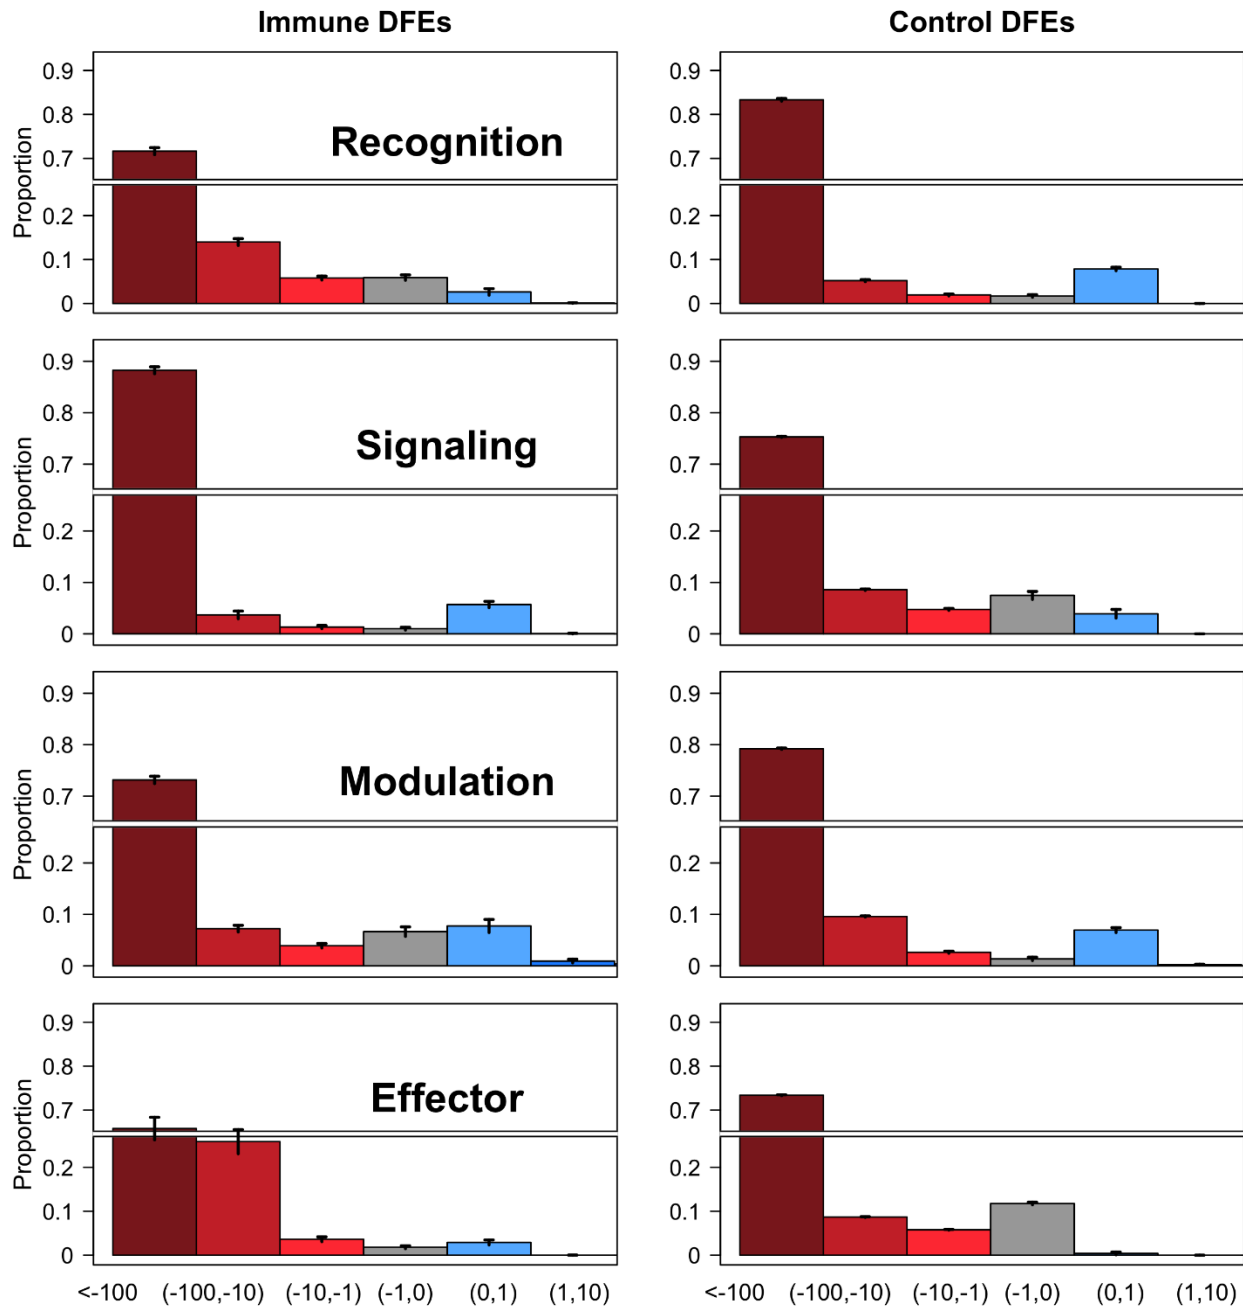

940  
 941 **Figure 4.** Predicted distributions of fitness effects of new, non-synonymous mutations for each of  
 942 the four classes of immune genes (left column) and their paired-control sets (right column). Bars  
 943 represent the proportion of variants that fall within a given selective class (s), from strongly  
 944 deleterious (far left, darkest red) to beneficial (right, blue). Each plot is scaled with the same y-axis  
 945 and has a gap from 0.25 to 0.65 to allow visualization of the whole distribution. Vertical lines on  
 946 each bar, while mostly too small to notice, represent twice the standard error of the mean per-  
 947 selective-class estimate from one hundred parametric bootstrap replicates. Estimates come from  
 948 the tool polyDFE.

949

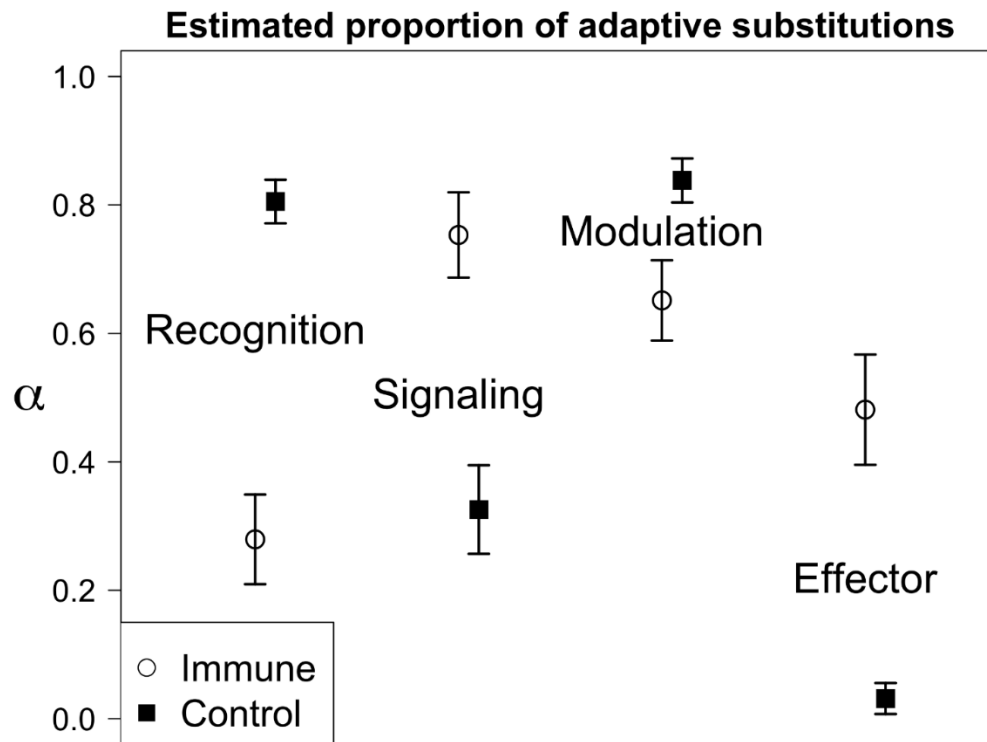

950  
951 **Figure 5.** Estimates of the proportion of substitutions resulting from adaptive processes ( $\alpha$ ) based  
952 on DFEs computed in polyDFE. Each immune gene class (open circles) has a paired-control set of  
953 genes immediately to its right (filled squares). Error bars represent twice the standard error of the  
954 mean of one hundred parametric bootstrap replicates of the input data (site frequency spectra). All  
955 immune-control comparisons are significantly different from zero and each immune class is  
956 significantly different from its controls.  
957

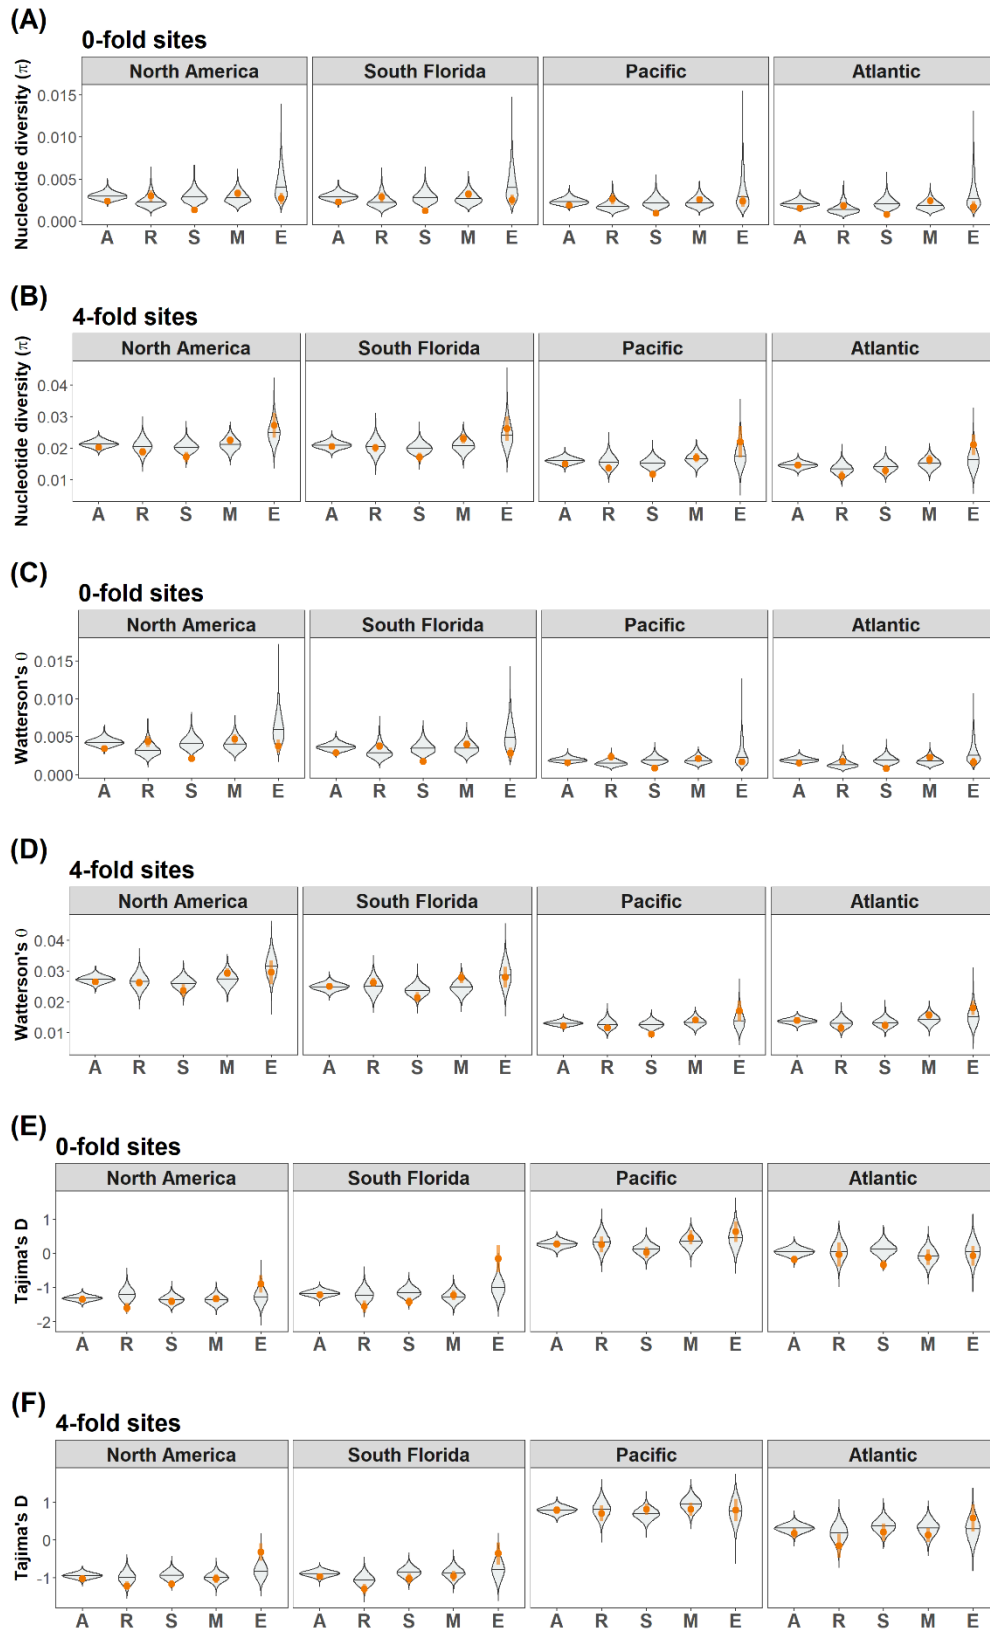

959 **Figure 6.** Population genetic statistics of immune genes in all four populations (North America,  
960 Florida, Pacific, and Atlantic) using the paired-control approach. 0-fold sites shown in (A), (C),  
961 and (E), and 4-fold sites shown in (B), (D), and (F). (A) and (B): Nucleotide diversity ( $\pi$ ); (C) and  
962 (D): Watterson's  $\theta$ ; (E) and (F): Tajima's D. Each immune gene group was compared to selected  
963 pair-control sets. Violin plots show the distribution of the mean of each control set generated with  
964 10, 000 permutations. The orange dots and vertical lines indicate mean  $\pm 1$  SEM of the immune  
965 gene group of interest. X-axis represents immune gene groups: all immune genes (A), recognition  
966 genes (R), signaling genes (S), modulation genes (M), and effector genes (E).  
967

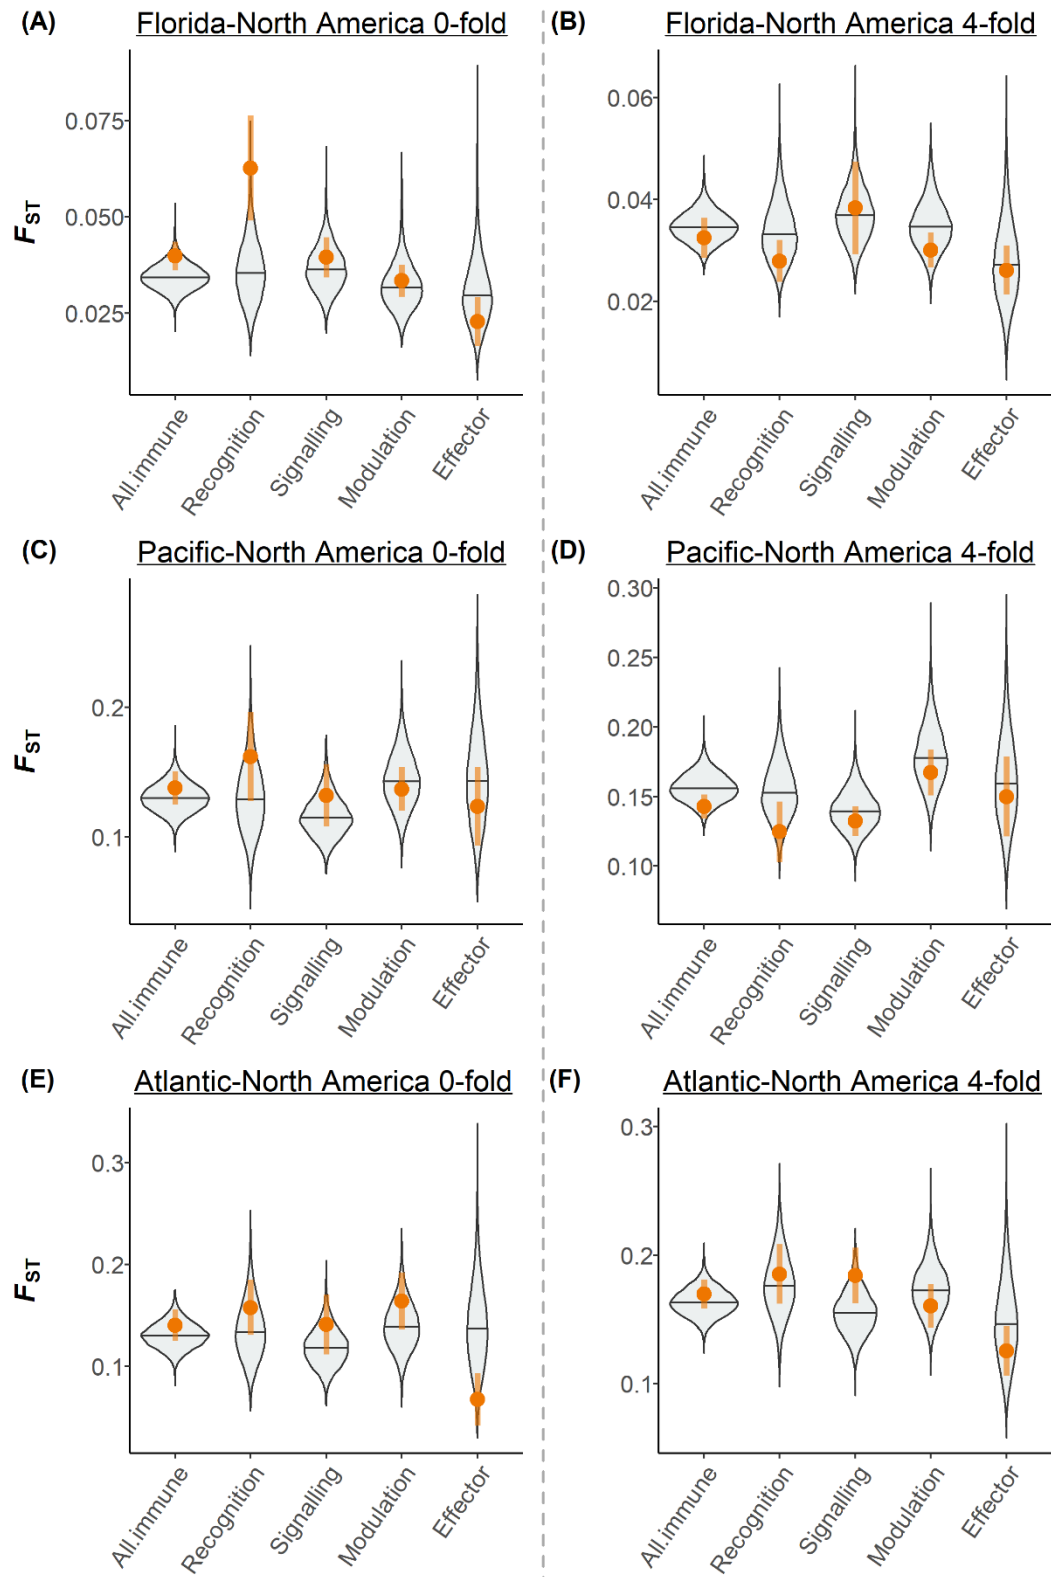

968  
969

**Figure 7.**  $F_{ST}$  of immune genes in each derived population compared to the ancestral (North

970 American) population using the paired-control approach. 0-fold sites shown in (A), (C), and (E),  
971 and 4-fold sites shown in (B), (D), and (F). (A)-(B): South Florida population ( $\pi$ ); (C)-(D): Pacific  
972 population; (E)-(F): Atlantic population. Each immune gene group was compared to selected pair-  
973 control sets. Violin plots show the distribution of the mean of each control set generated with 10,  
974 000 permutations. The orange dots and vertical lines indicate mean  $\pm 1$  SEM of the immune gene  
975 group of interest.  
976

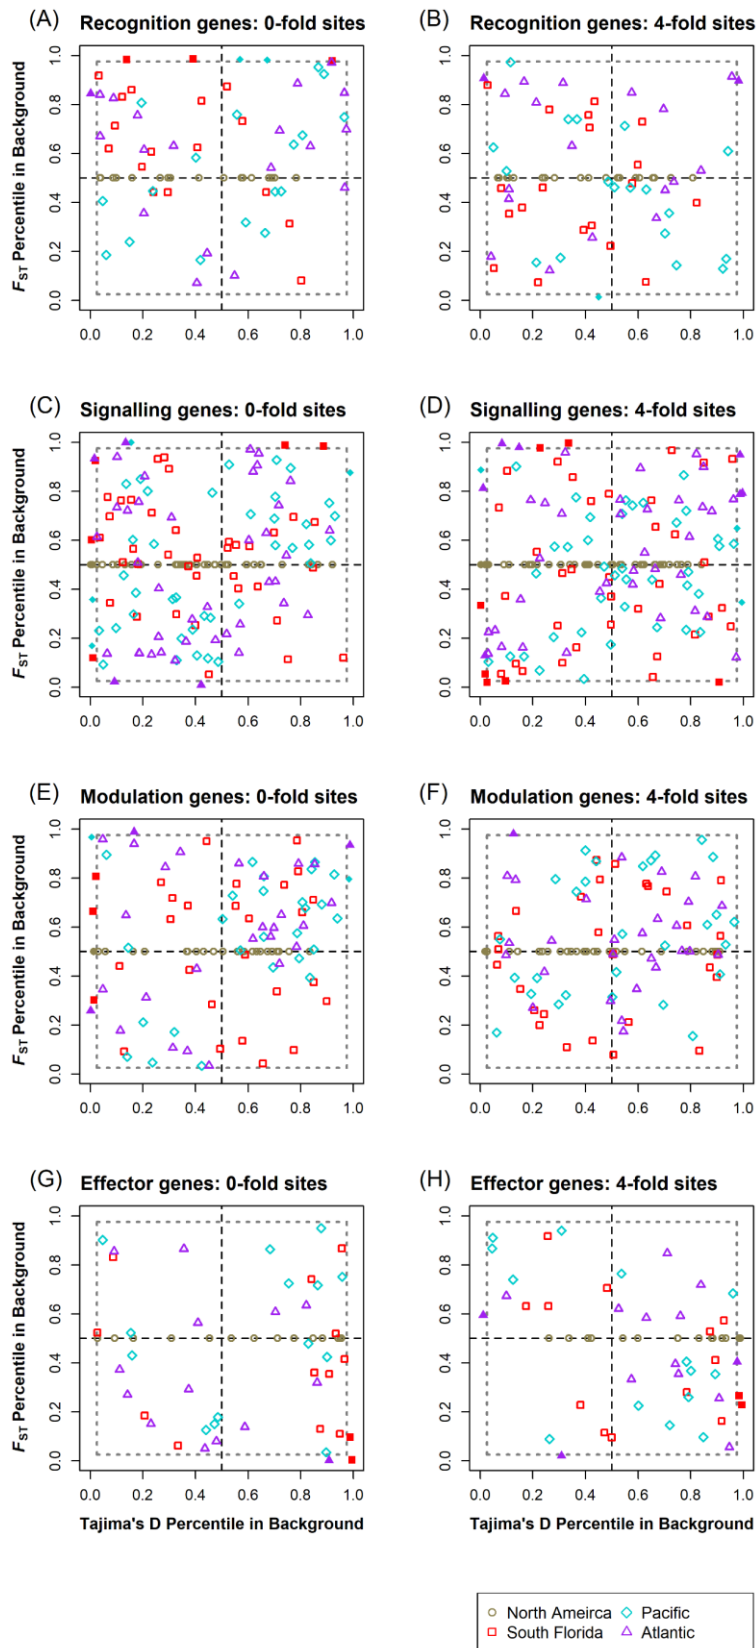



978 **Figure 8.** Tajima's  $D - F_{ST}$  plots of the four immune gene functional classes. 0-fold sites shown in  
979 (A) – (D) and 4-fold sites shown in (E) – (H). (A) and (E): recognition ( $N = 19$ ; 57.9% outlier in  
980 0-fold; 31.6% outlier in 4-fold); (B) and (F): signaling ( $N = 41$ ; 36.6% outlier in 0-fold; 53.7%  
981 outlier in 4-fold); (C) and (G): modulation ( $N = 28$ ; 46.6% outlier in 0-fold; 17.9% outlier in 4-  
982 fold); (D) and (H): effector ( $N = 14$ ; 64.3% outlier in 0-fold; 57.1% outlier in 4-fold). In each plot,  
983 populations were labeled in different colors and shapes. One dot represents one immune gene in  
984 one population, shown as their percentile in the genome background. Solid dots are outliers.  
985 Outliers were defined as  $< 2.5^{\text{th}}$  percentile or  $> 97.5^{\text{th}}$  percentile of the genome background. Dotted  
986 black lines indicate the median of genome background in each of the two measures, dividing the  
987 plot into four quadrants. Dotted gray lines indicate the boundaries of outlier areas. All data from  
988 the North American population, the reference population for  $F_{ST}$ , were plotted on the  $y = 0.5$   
989 horizontal line since they do not have  $F_{ST}$  results.
